# Supplementary material for: Resting-state functional dynamics alterations relate to plasma amyloid markers and explain memory impairments in the TgF344-AD model of Alzheimer’s disease.
Source: Research Square preprint supplement (doi:10.21203/rs.3.rs-8601049/v1), 2026-02-05
Supplement: Supplementary file 1 [file eaf0f3f9edb12962351da1cf.docx]

**Supplementary Figures:**

**
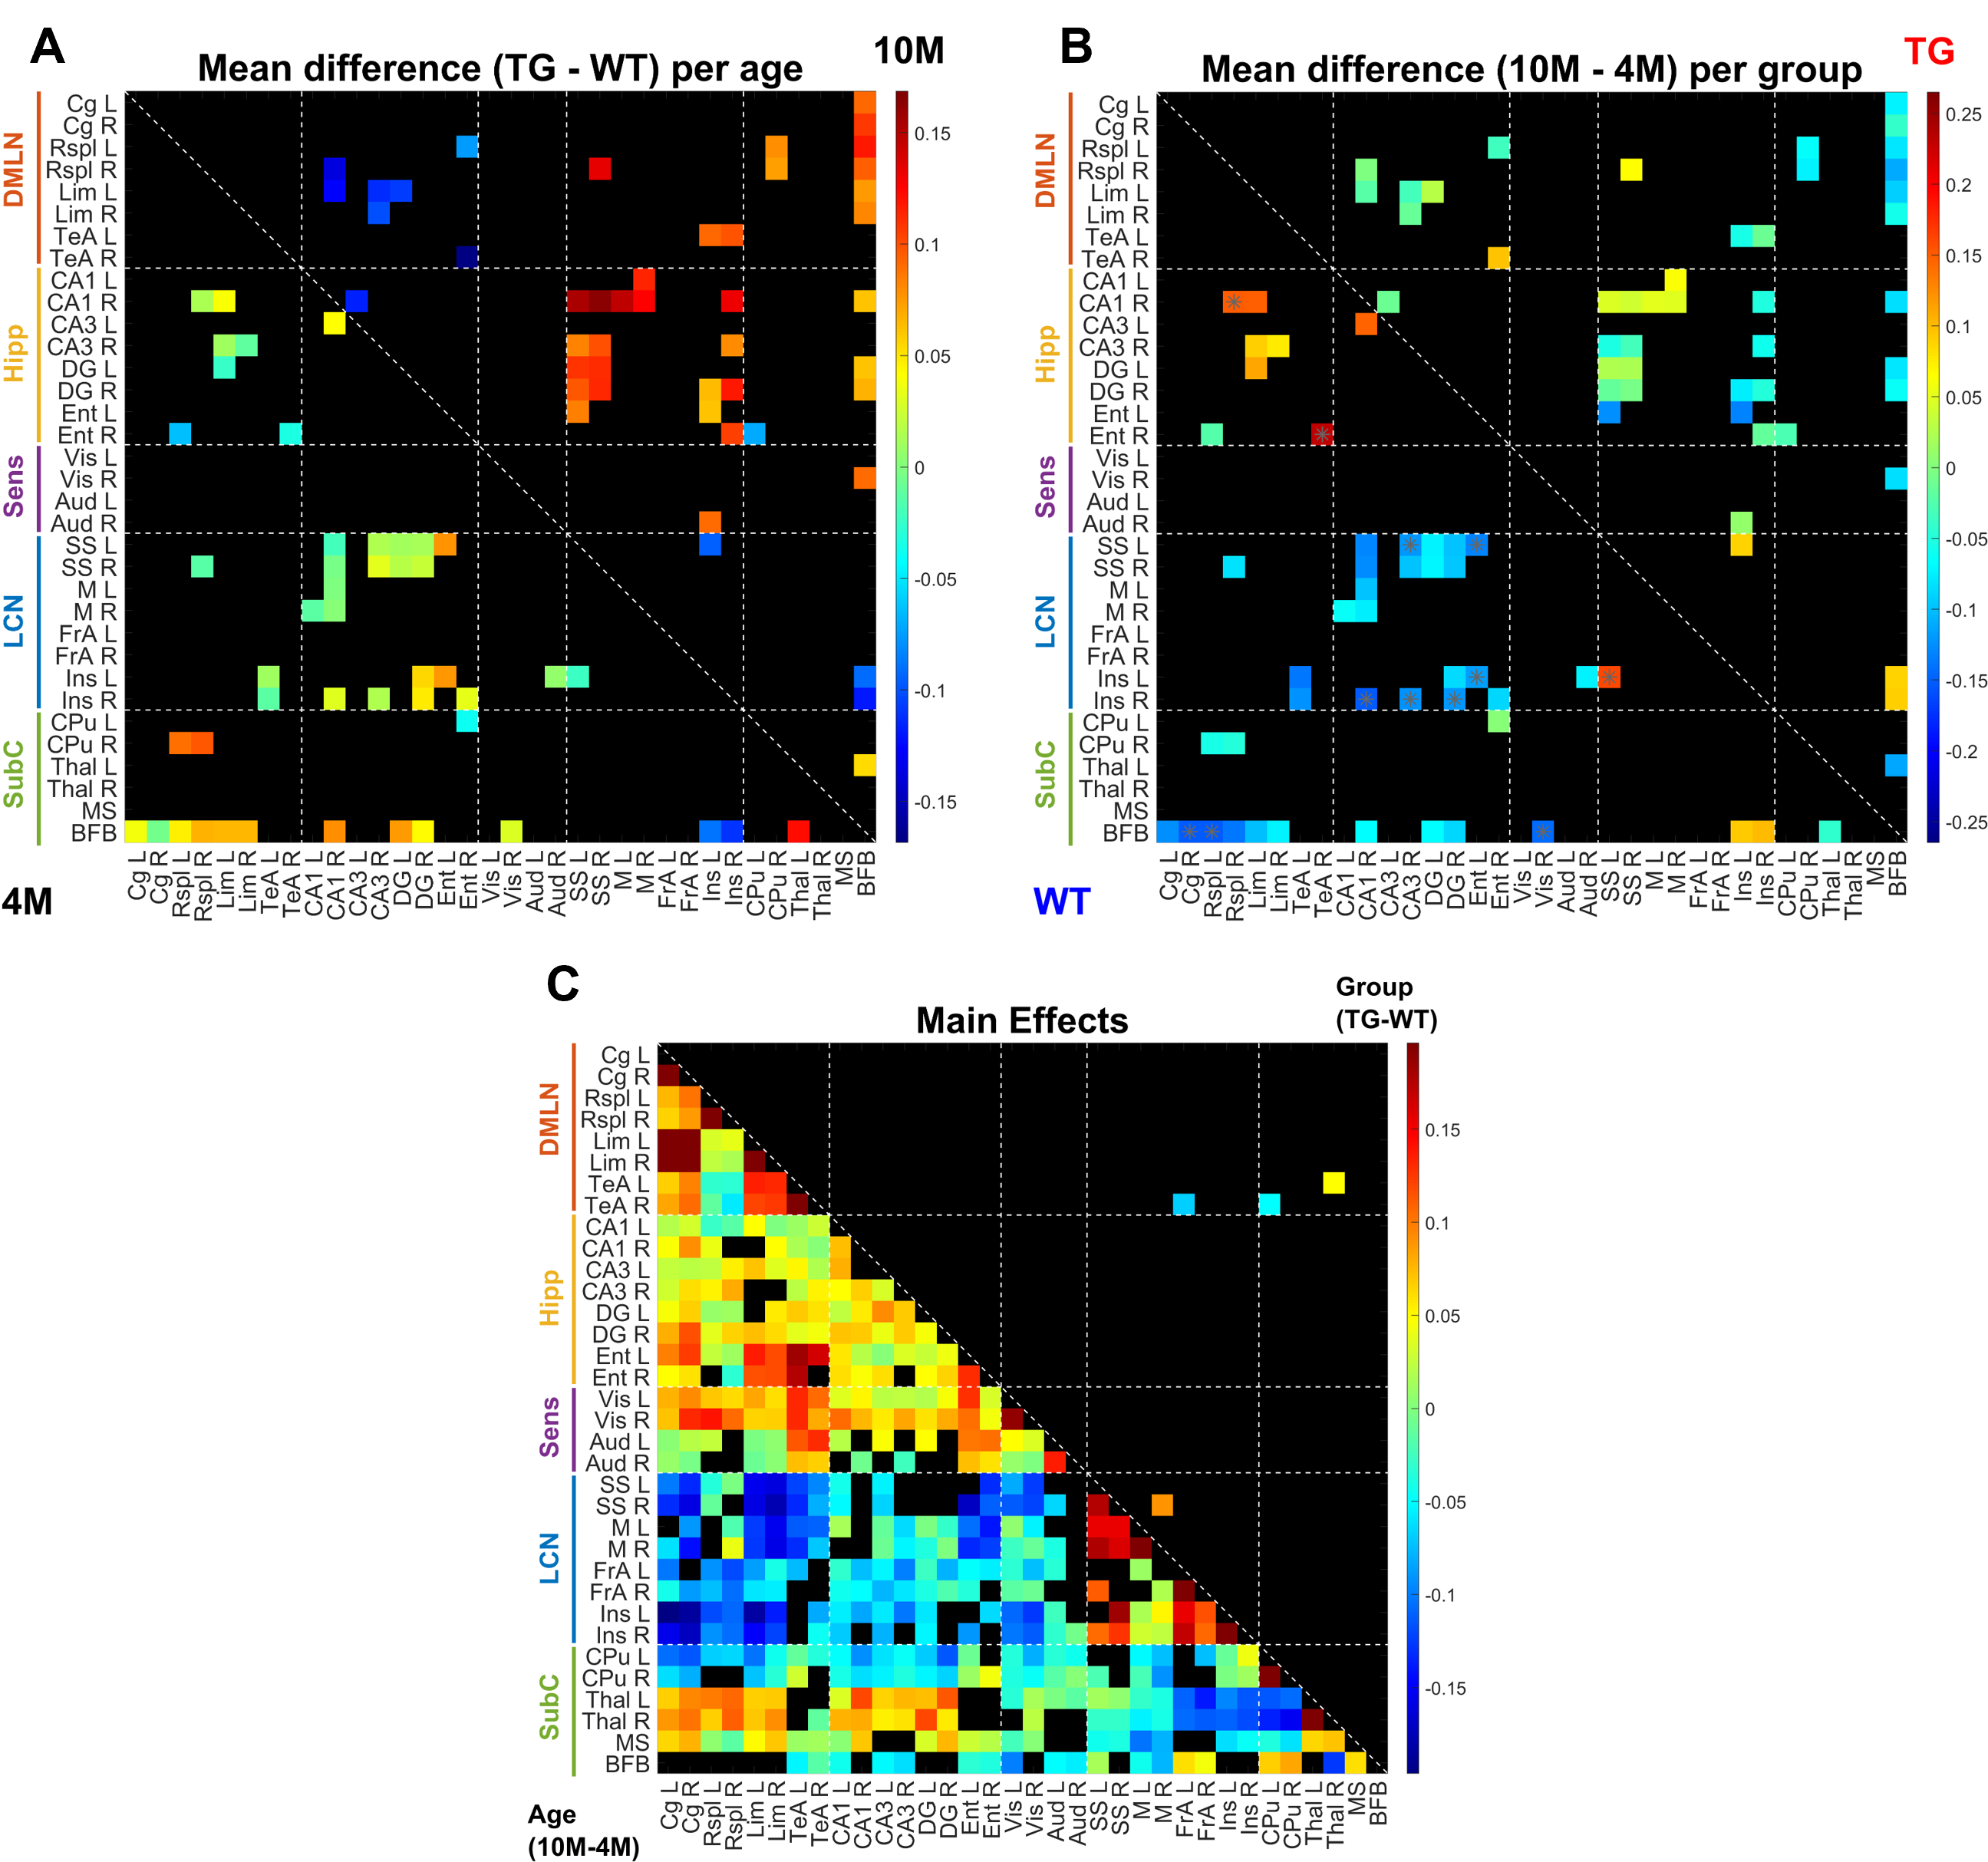
**

**Supplementary Figure 1: A, B:** Inter-genotype difference (A; 4M/10M: below/above the diagonal) and inter-age difference (B; WT/TG: below/above the diagonal) in FC for ROI-pairs that showed a significant genotype*age interaction effect (p < 0.05, repeated measures two-way ANOVA). **C**: Inter-age difference (below the diagonal) and inter-genotypic group difference (above the diagonal) in FC for ROI-pairs that showed a significant (p < 0.05, repeated measures two-way ANOVA) main effect of age and genotype respectively. Asterisk: p < 0.05, FDR corrected for all ROI pairs found to be significant for each effect.

**
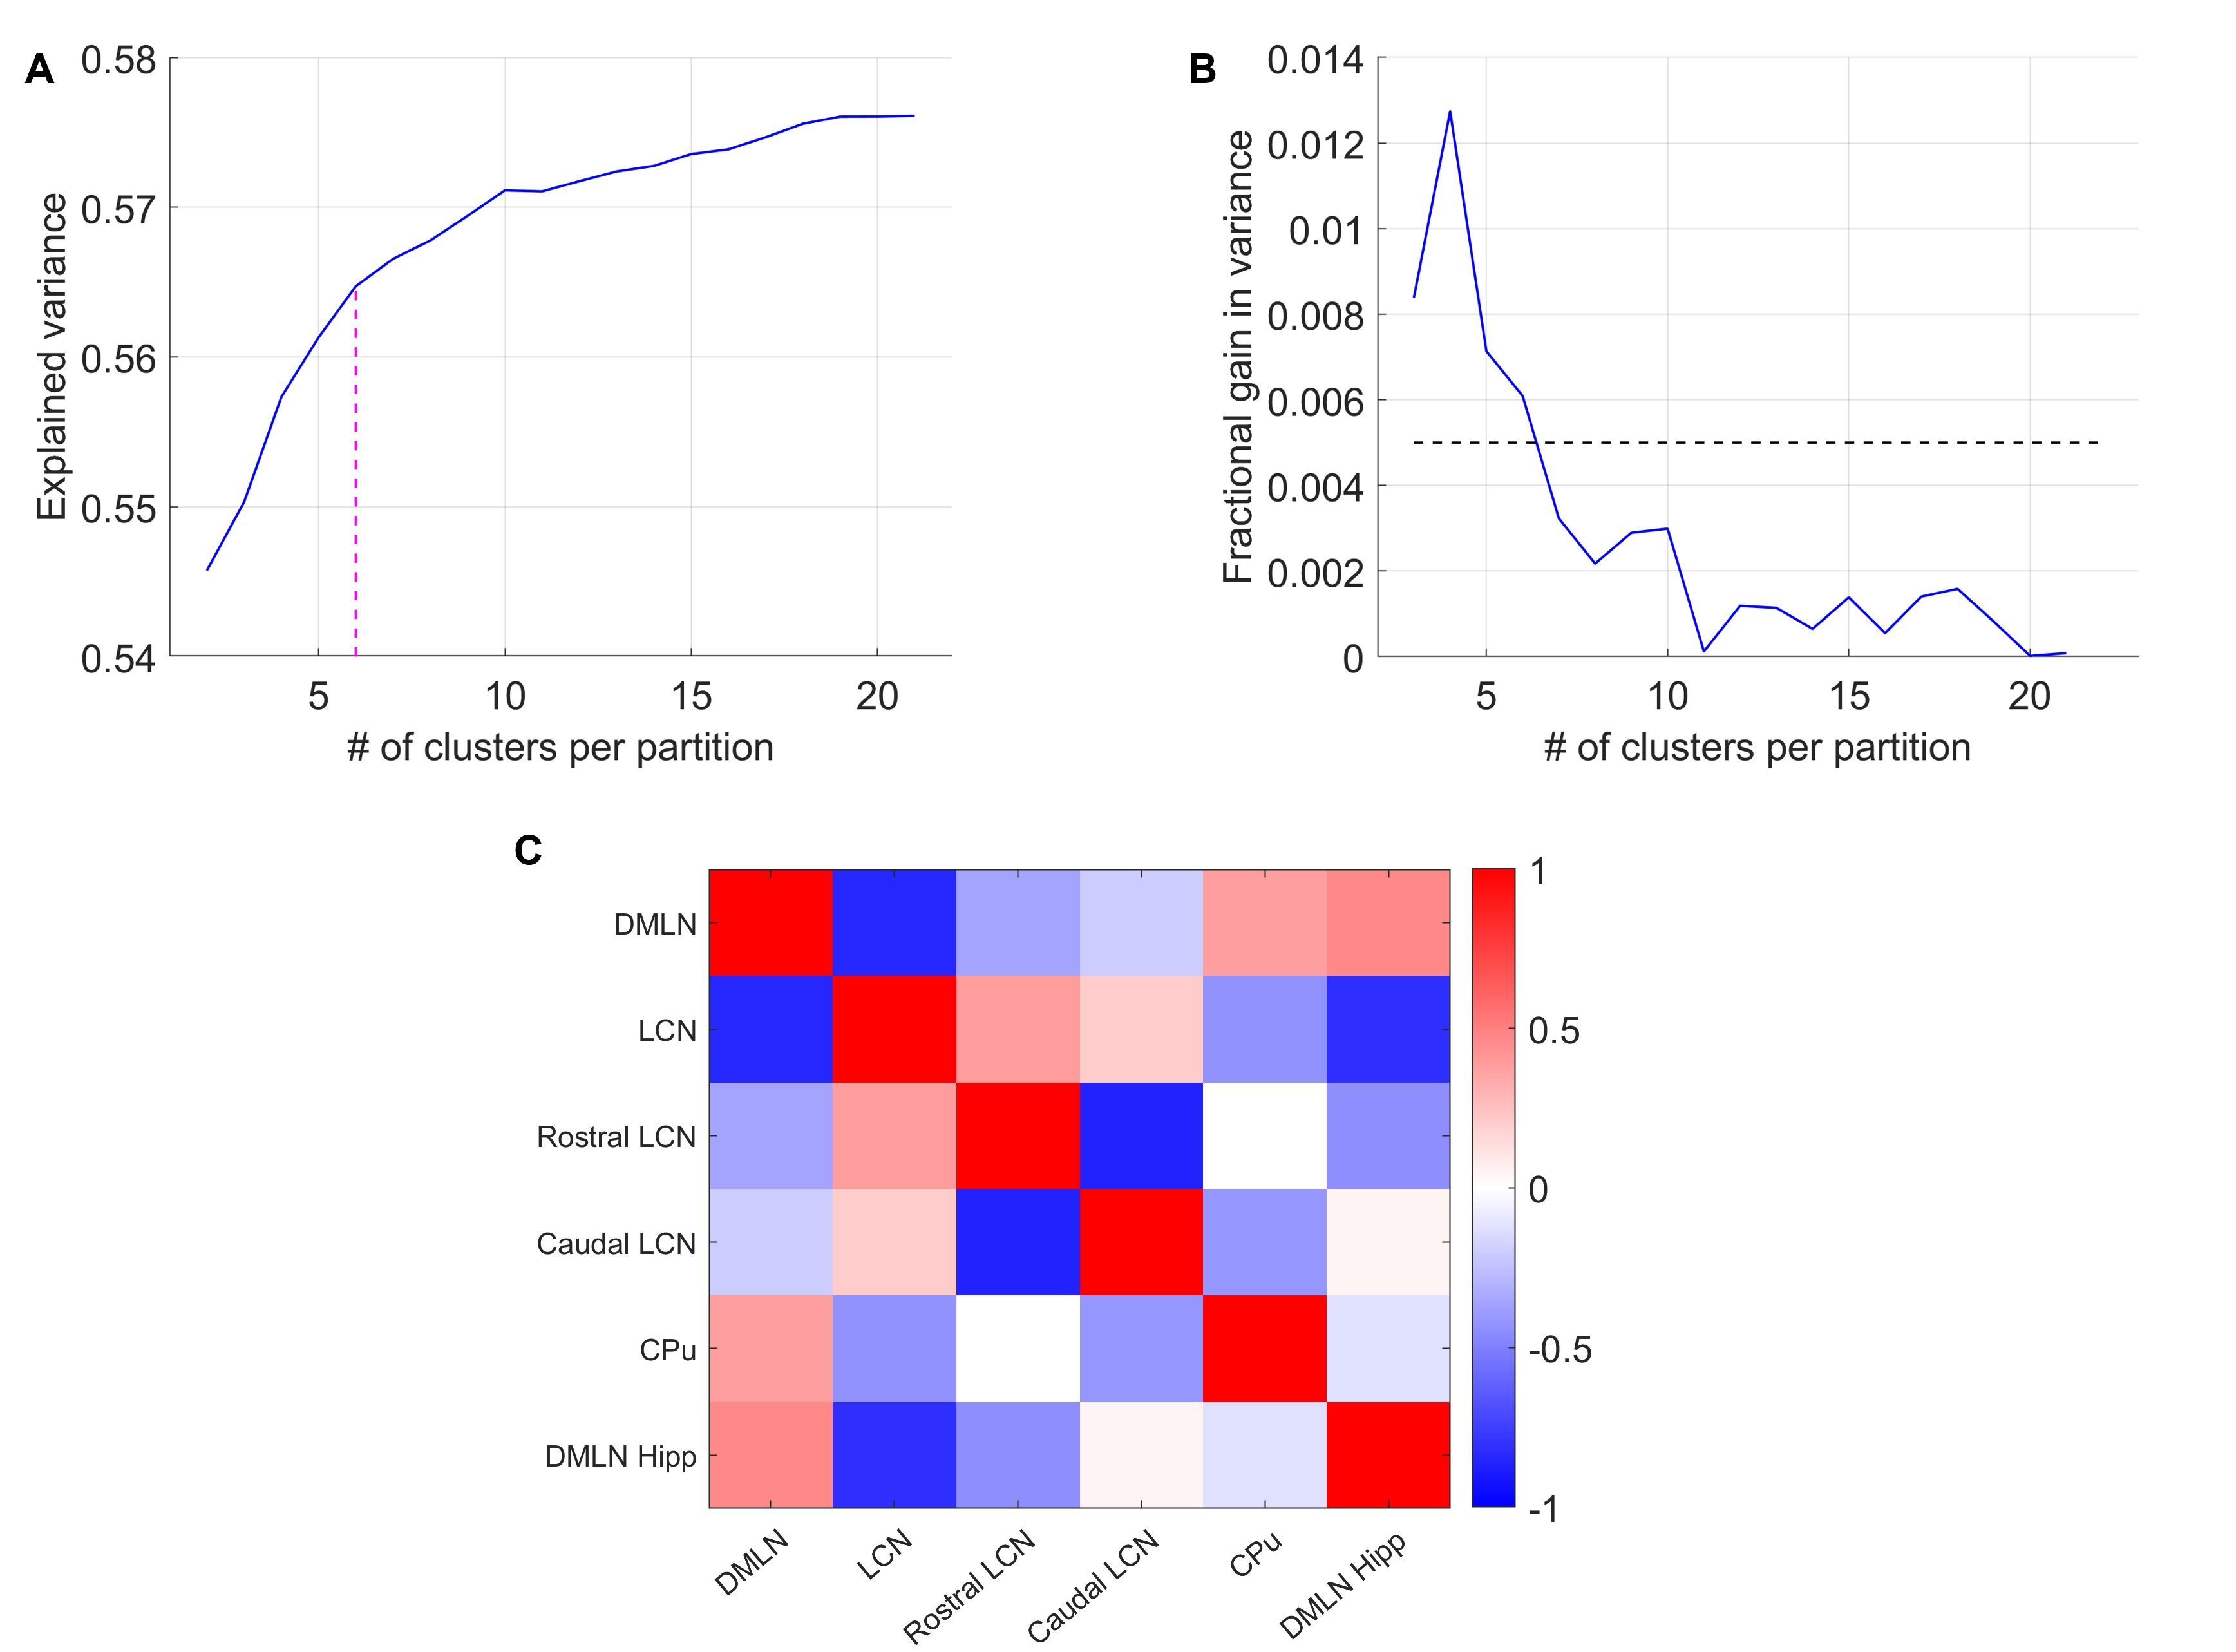
**

**Supplementary Figure 2: A:** Variance in the concatenated image-series explained by different numbers of clusters. Magenta vertical line shows the optimal number of clusters corresponding to the elbow point of this curve. **B:** Fractional gain in variance in going from k-1 to k clusters as a function of number of clusters. **C:** Pearson’s correlation between spatial patterns of every pair of CAPs shows the first four CAPs forming two anticorrelated pairs while the last two CAPs do not show high anticorrelation.


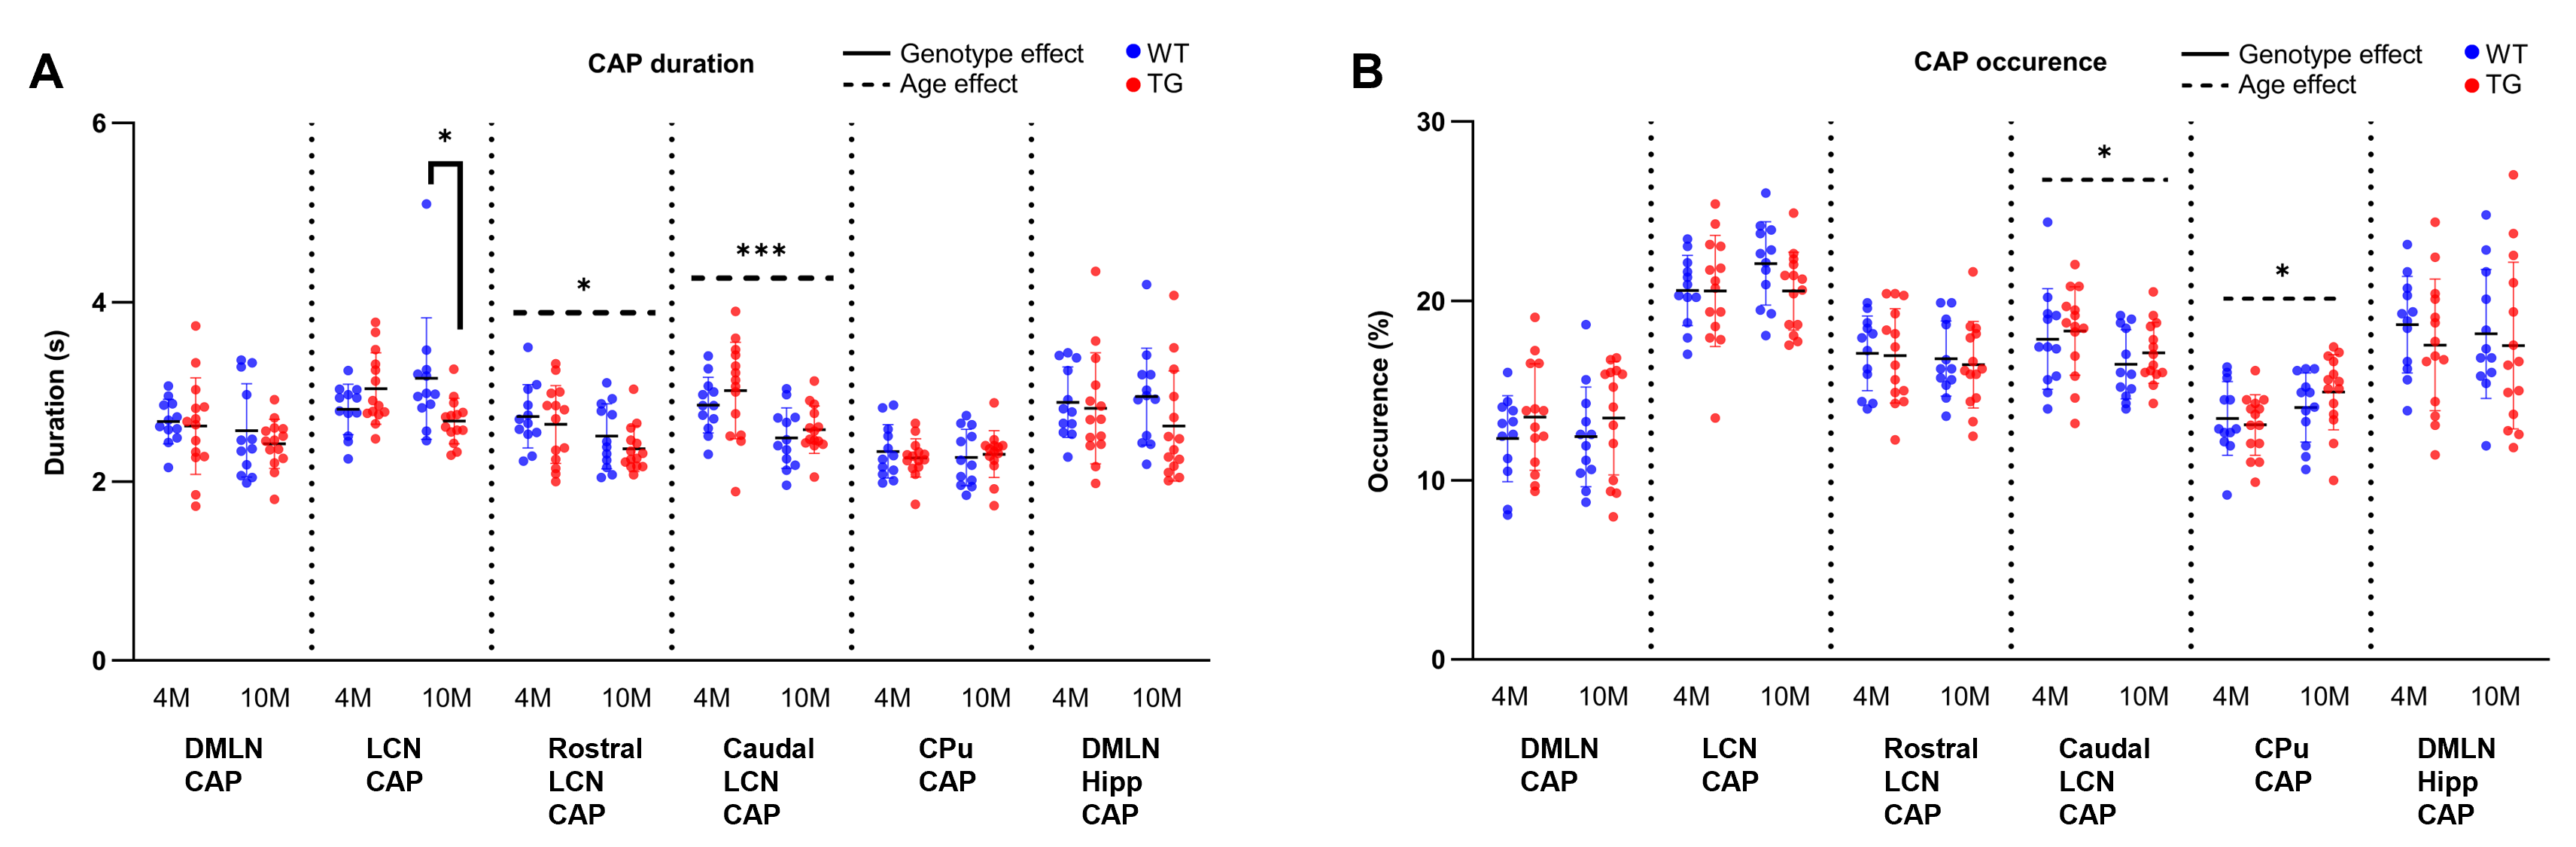


**Supplementary Figure 3:** Age, genotypic group, and interaction effects on CAP duration (A), and occurrence (B) using repeated measures two-way ANOVA followed by appropriate post-hoc comparisons. *: p < 0.05; ***: p < 0.001.

**
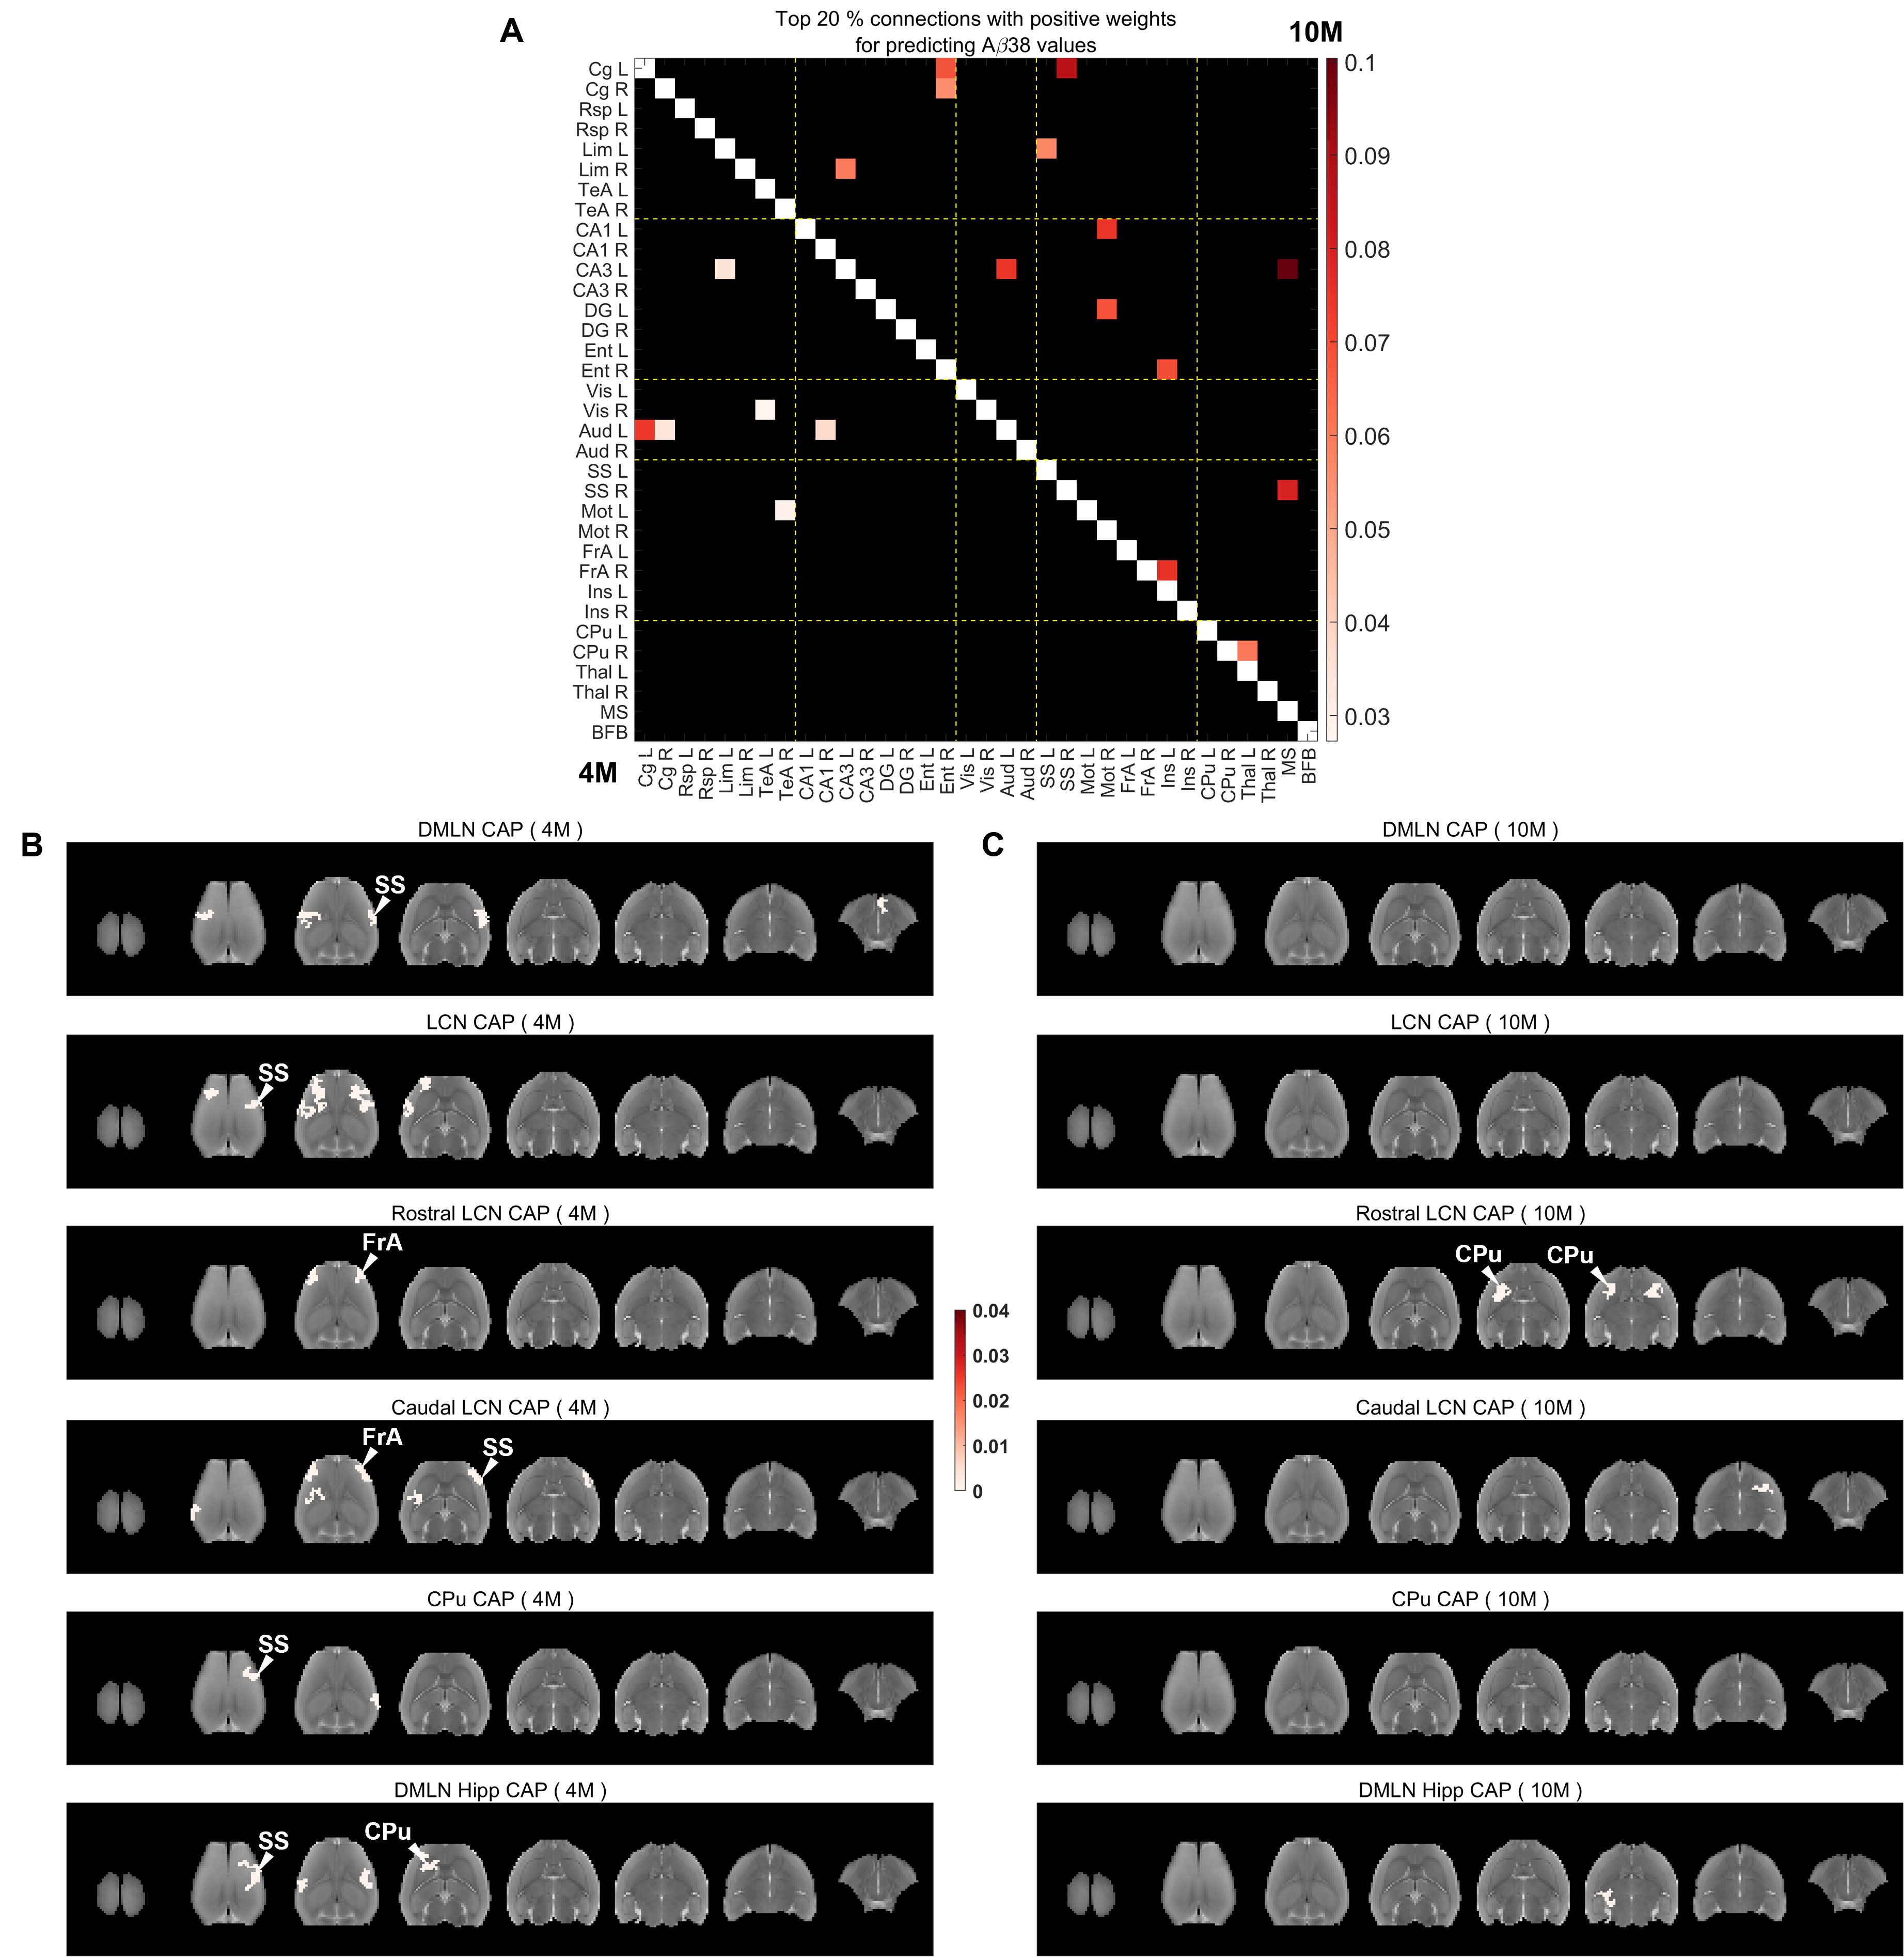
**

**Supplementary Figure 4: Salient functional connections (A) and voxel-clusters (B-C) within CAPs with positive beta weights at pre-plaque and plaque stages that explain values in the TG animals. A:** Top 20% highest positive beta weights of functional connections with significant 95% FWER-corrected confidence intervals at 4M (below the diagonal) and 10M (above the diagonal). **B, C:** Positive beta weights for salient clustered voxels (cluster-size: 20 voxels, in plane), for which FWER corrected 95% confidence intervals do not cross zero, in each CAP at 4M (B) and 10M (C).


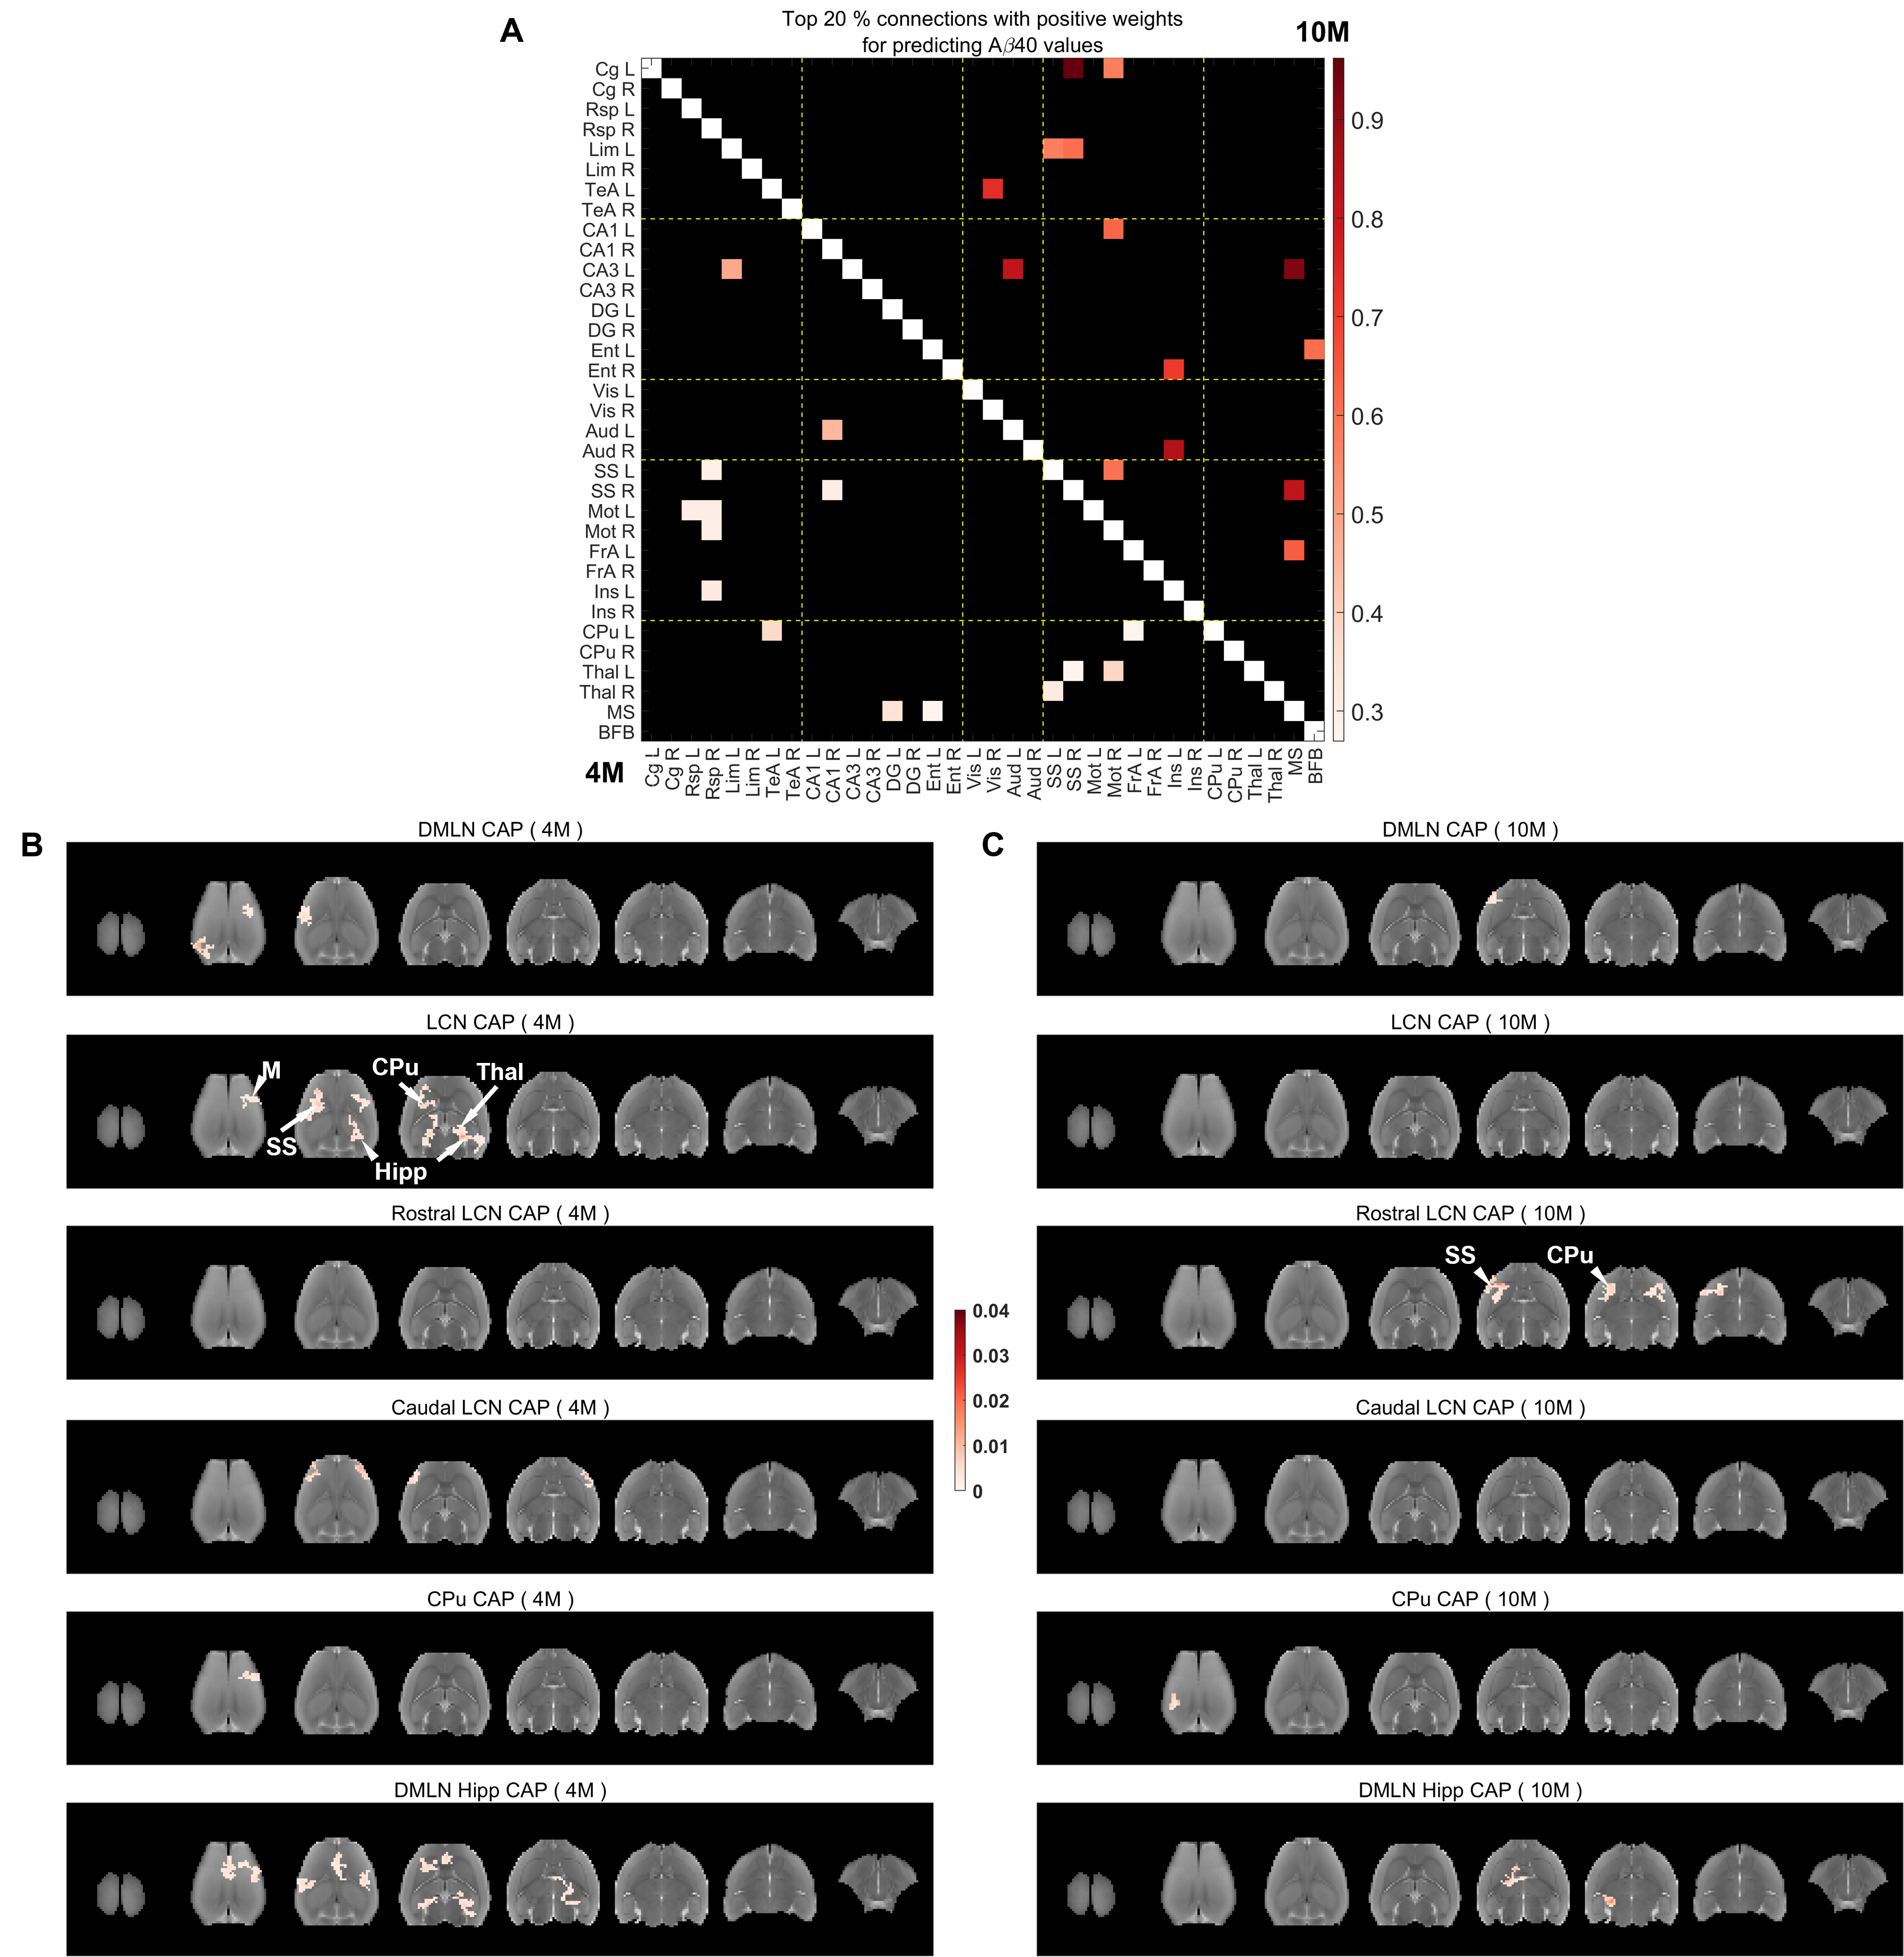


**Supplementary Figure 5: Salient functional connections (A) and voxel-clusters (B-C) within CAPs with positive beta weights at pre-plaque and plaque stages that explain values in the TG animals. A:** Top 20% highest positive beta weights of functional connections with significant 95% FWER-corrected confidence intervals at 4M (below the diagonal) and 10M (above the diagonal). **B, C:** Positive beta weights for salient clustered voxels (cluster-size: 20 voxels, in plane), for which FWER corrected 95% confidence intervals do not cross zero, in each CAP at 4M (B) and 10M (C).

**
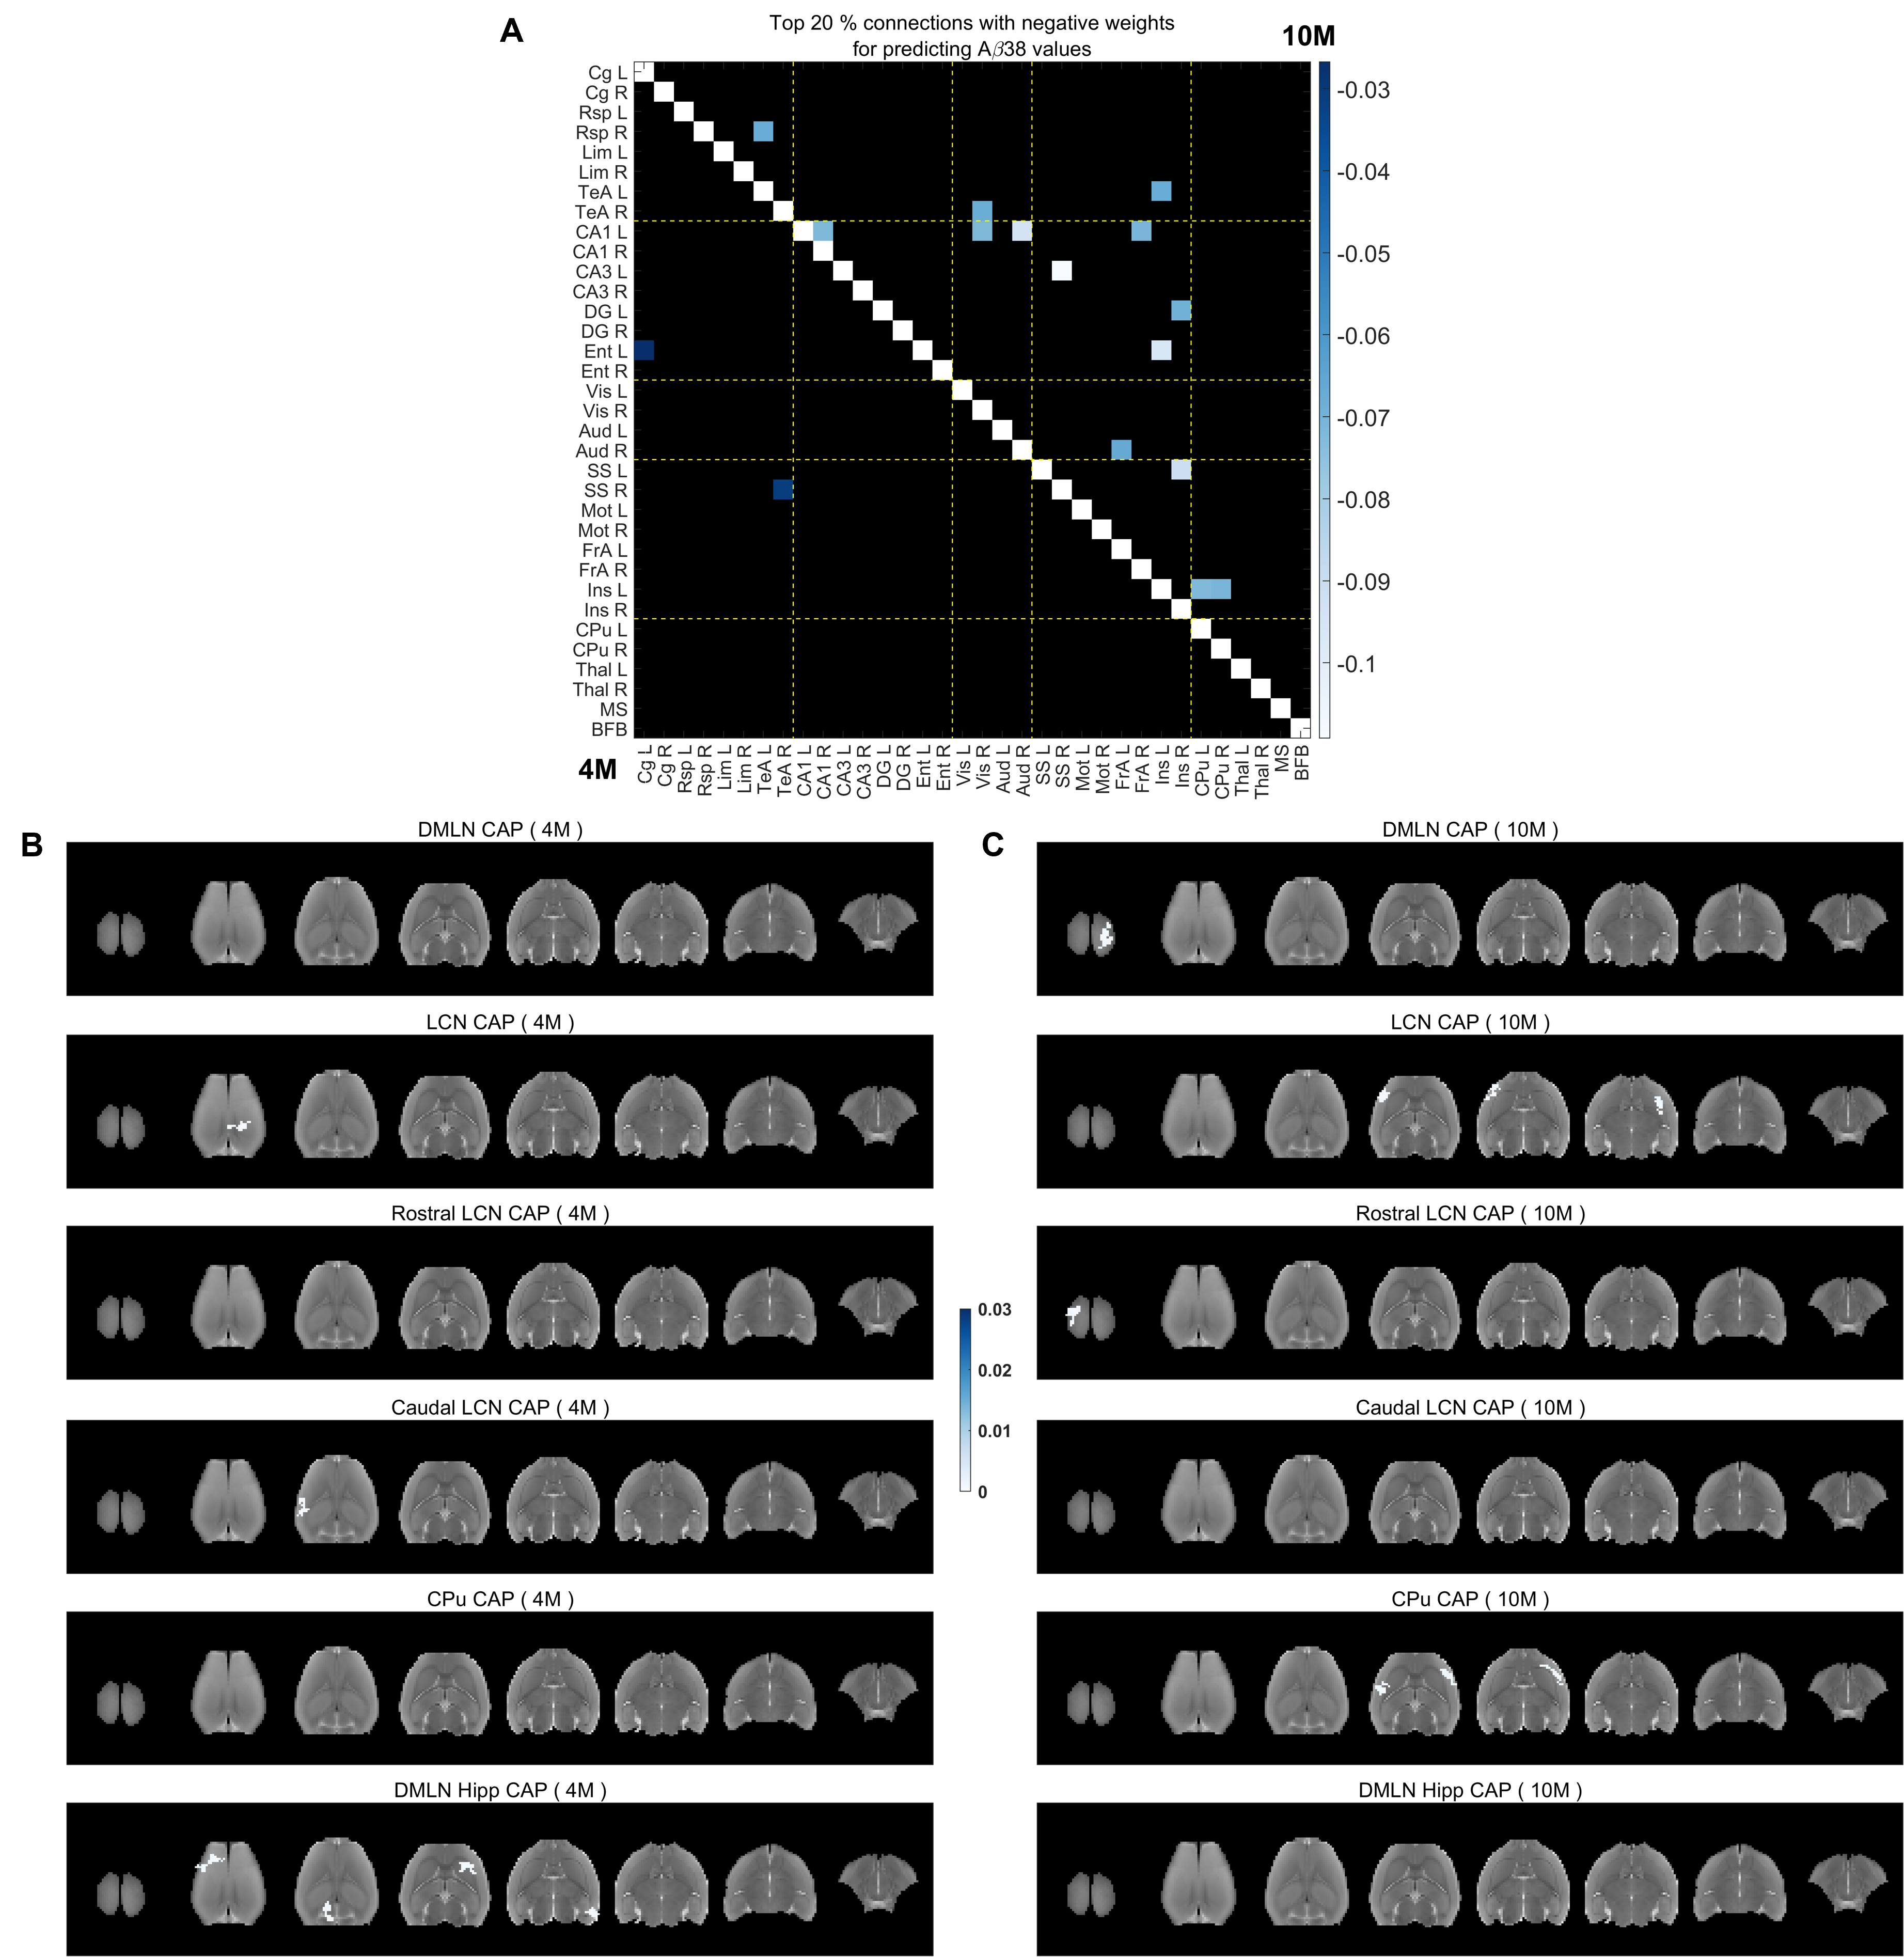
**

**Supplementary Figure 6: Salient functional connections (A) and voxel-clusters (B-C) within CAPs with negative beta weights at pre-plaque and plaque stages that explain values in the TG animals. A:** Top 20% highest negative beta weights of functional connections with significant 95% FWER-corrected confidence intervals at 4M (below the diagonal) and 10M (above the diagonal). **B, C:** Negative beta weights for salient clustered voxels (cluster-size: 20 voxels, in plane), for which FWER corrected 95% confidence intervals do not cross zero, in each CAP at 4M (B) and 10M (C).

**
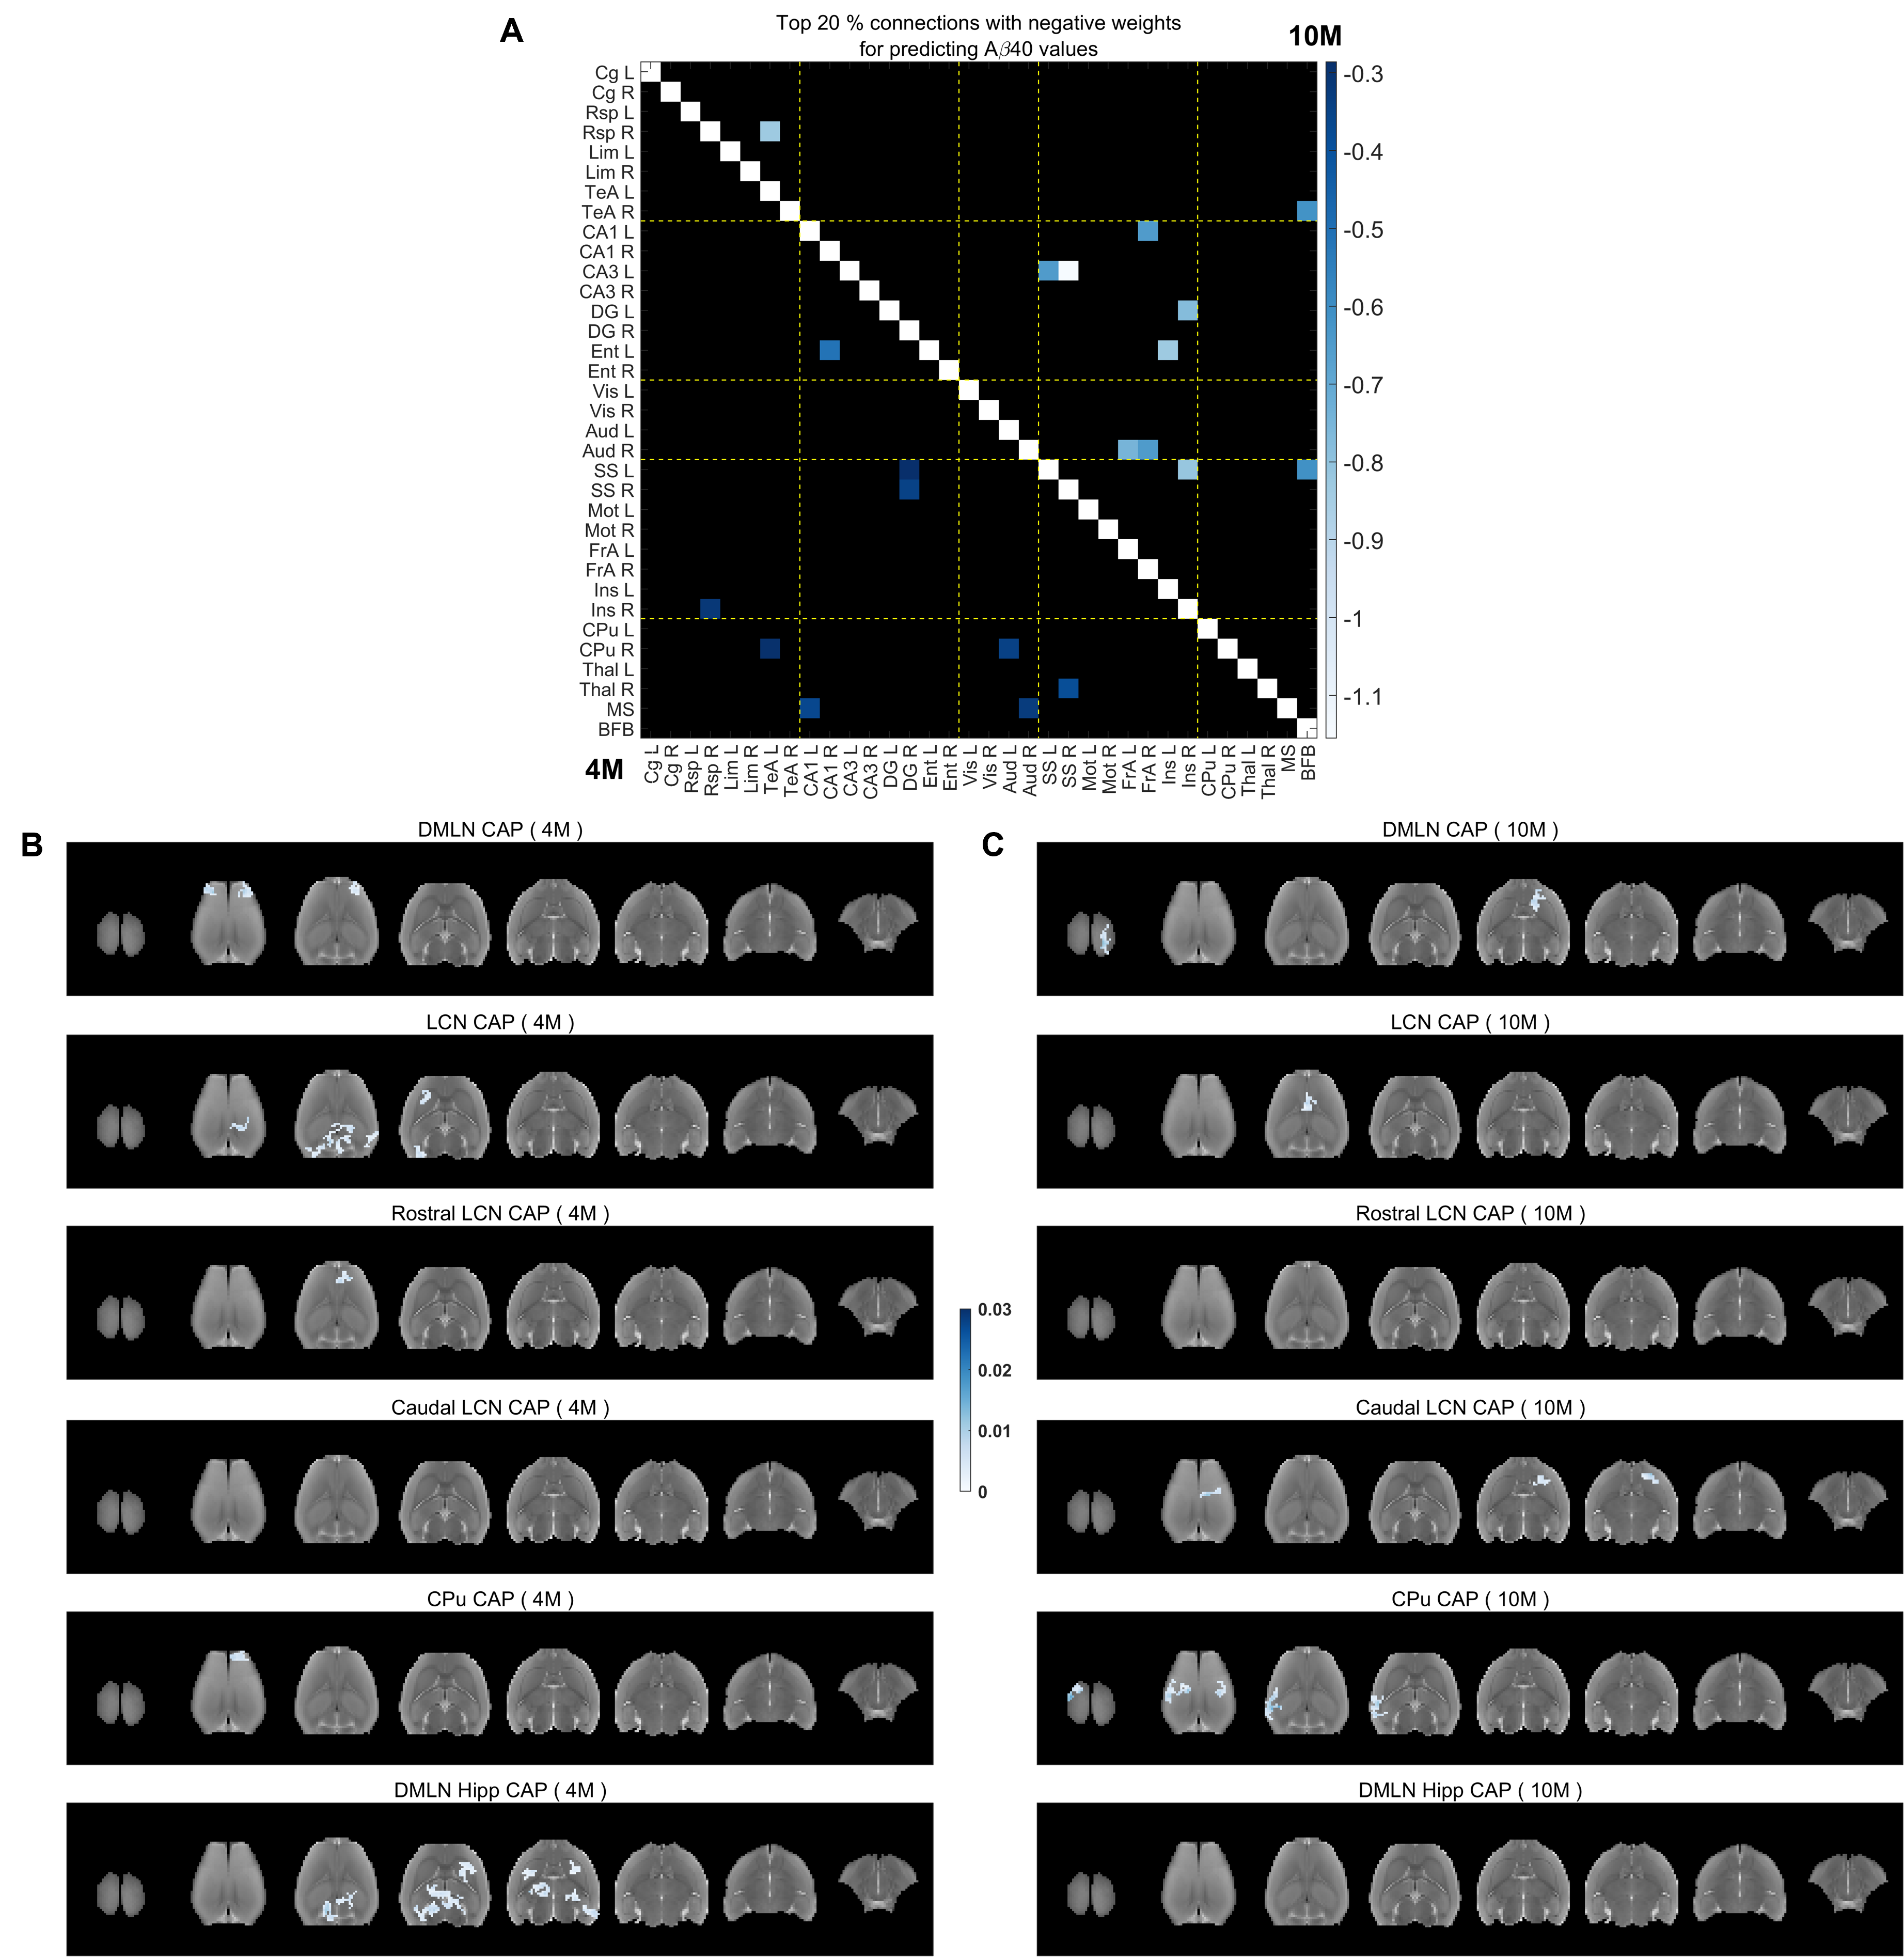
**

**Supplementary Figure 7: Salient functional connections (A) and voxel-clusters (B-C) within CAPs with negative beta weights at pre-plaque and plaque stages that explain values in the TG animals. A:** Top 20% highest negative beta weights of functional connections with significant 95% FWER-corrected confidence intervals at 4M (below the diagonal) and 10M (above the diagonal). **B, C:** Negative beta weights for salient clustered voxels (cluster-size: 20 voxels, in plane), for which FWER corrected 95% confidence intervals do not cross zero, in each CAP at 4M (B) and 10M (C).

**
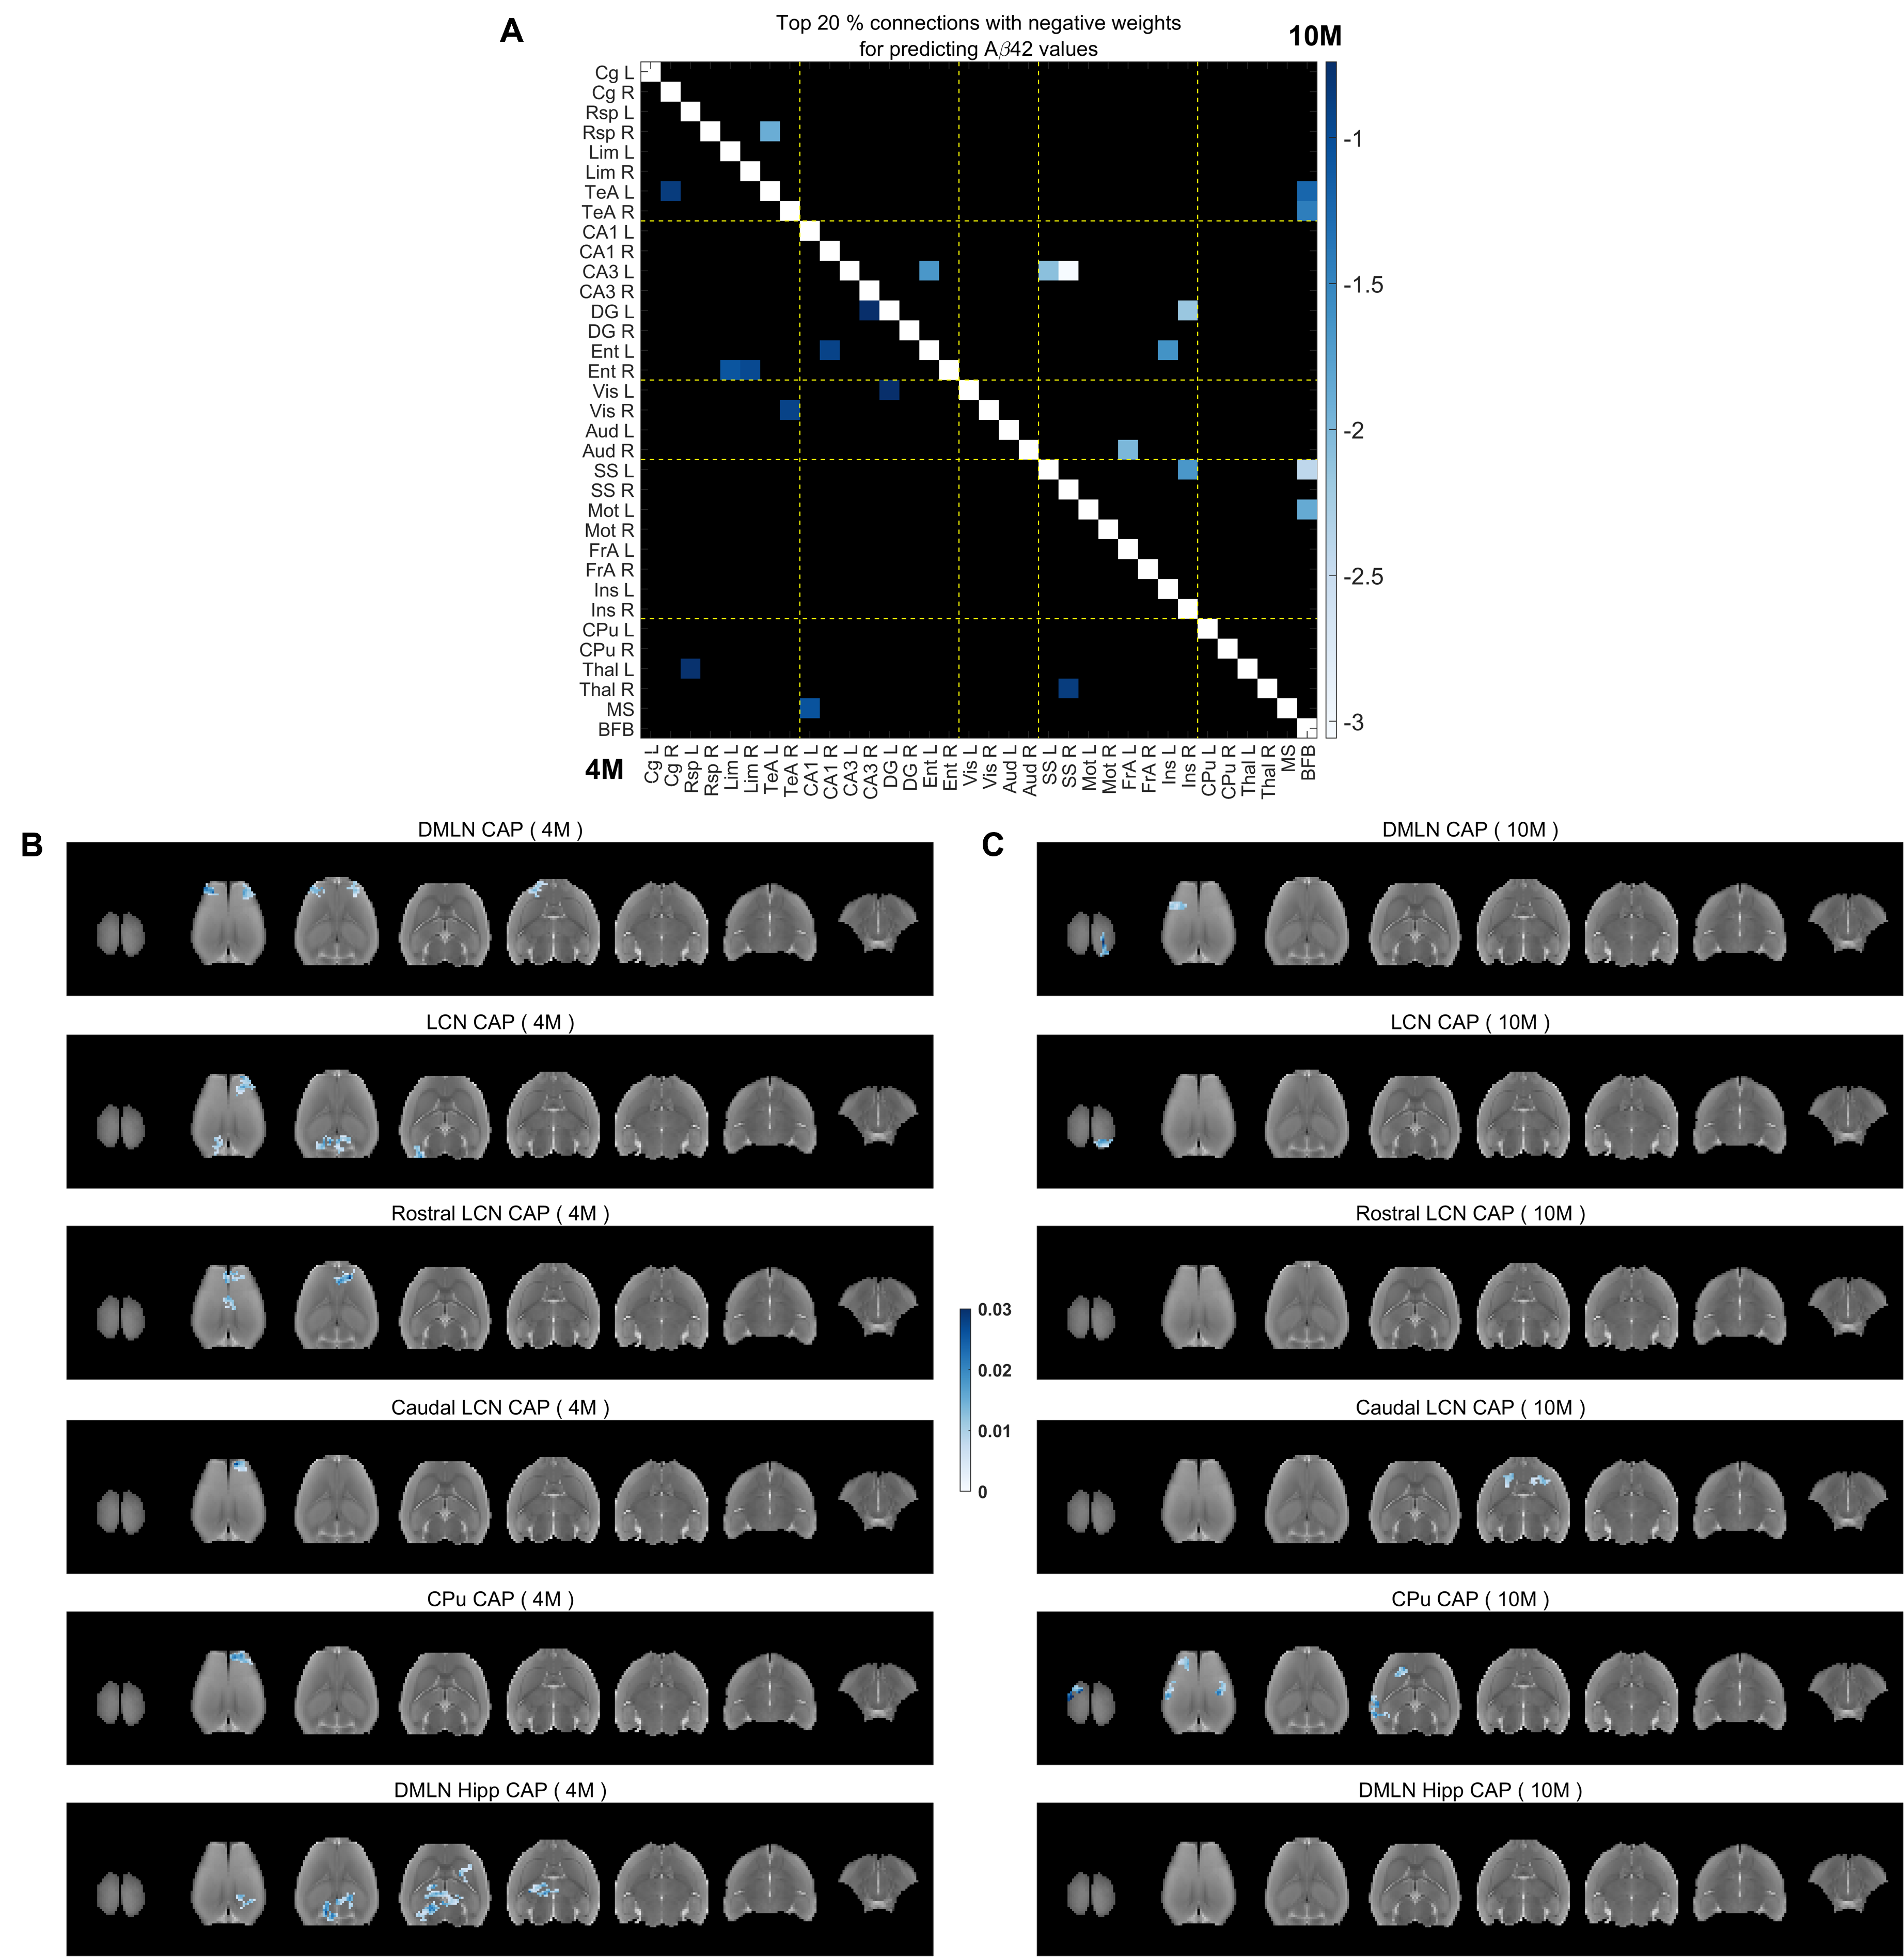
**

**Supplementary Figure 8: Salient functional connections (A) and voxel-clusters (B-C) within CAPs with negative beta weights at pre-plaque and plaque stages that explain values in the TG animals. A:** Top 20% highest negative beta weights of functional connections with significant 95% FWER-corrected confidence intervals at 4M (below the diagonal) and 10M (above the diagonal). **B, C:** Negative beta weights for salient clustered voxels (cluster-size: 20 voxels, in plane), for which FWER corrected 95% confidence intervals do not cross zero, in each CAP at 4M (B) and 10M (C).

**
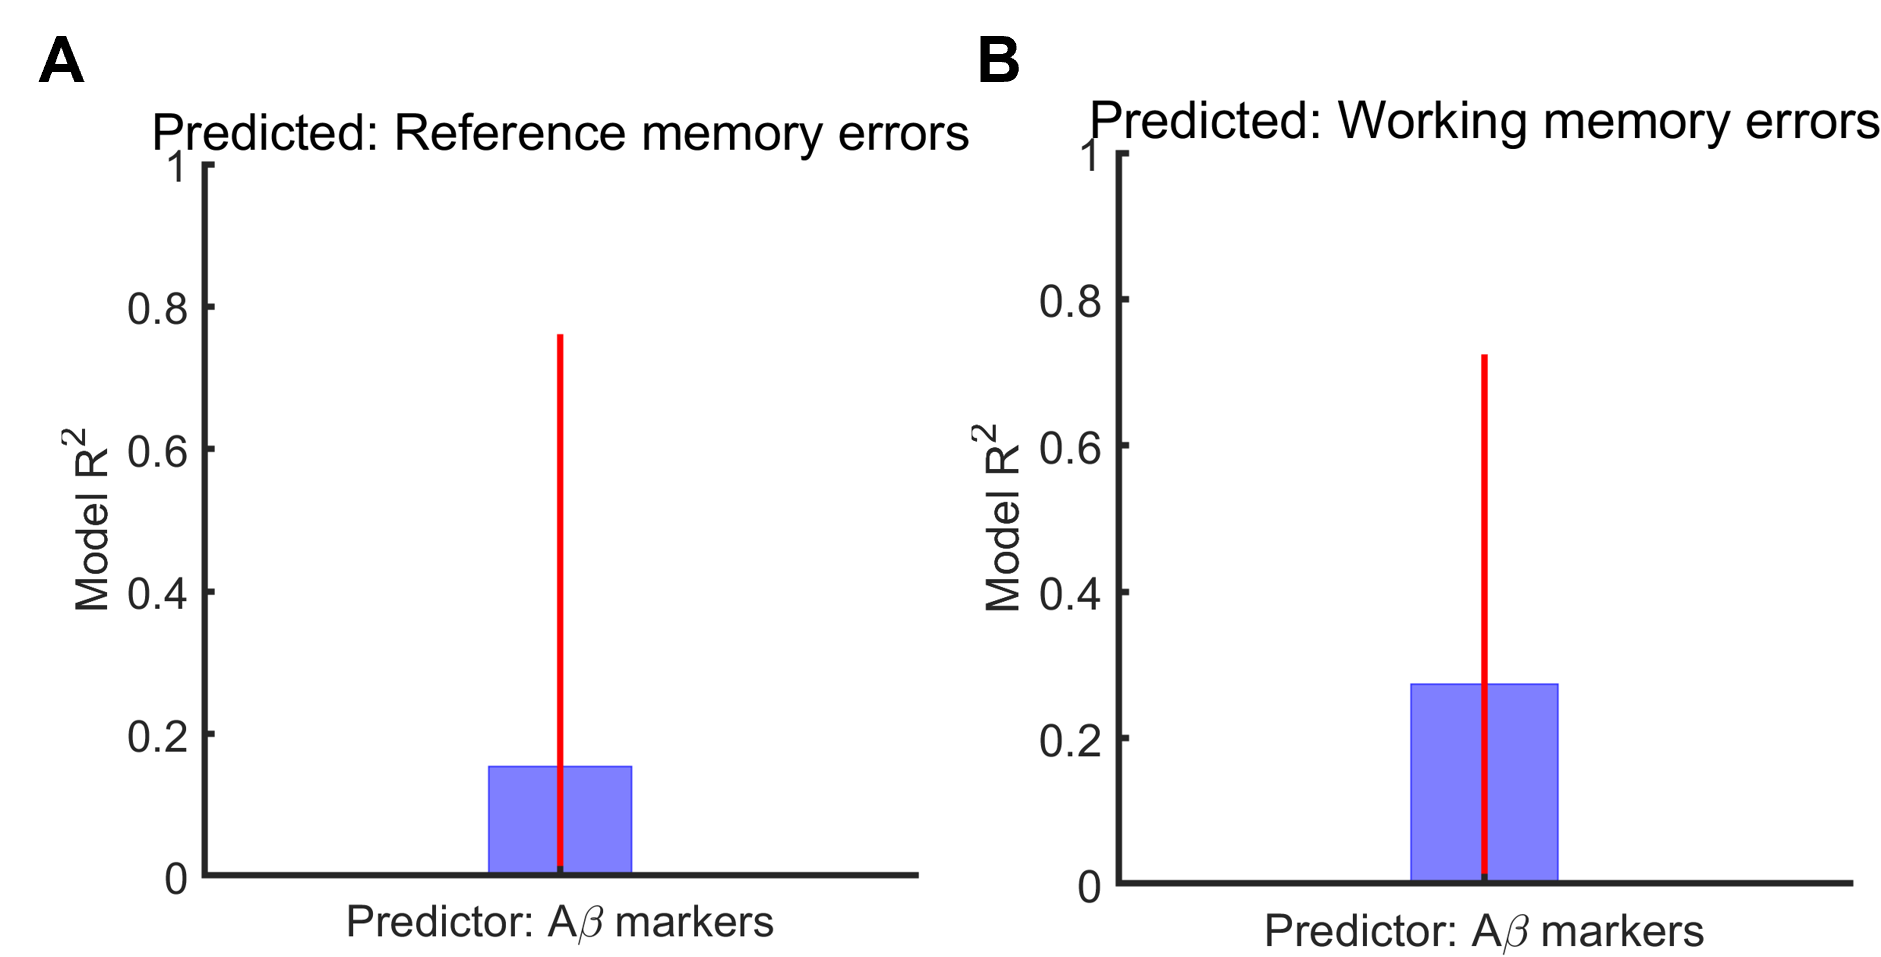
**

**Supplementary Figure 9:** PLSR model *R2* for predicting the performance on memory tasks (reference and working memory errors) on acquisition day 10 measured during the plaque stage (10.5M) using plasma levels of , , at the plaque (11M) stage. Here we used WT-normalized values for each amyloid marker to explain the WT-normalized values of reference memory errors (A), and working memory errors (B) in each individual TG subject respectively. Red vertical lines: family-wise error (FWE) - corrected 95% confidence intervals.

**
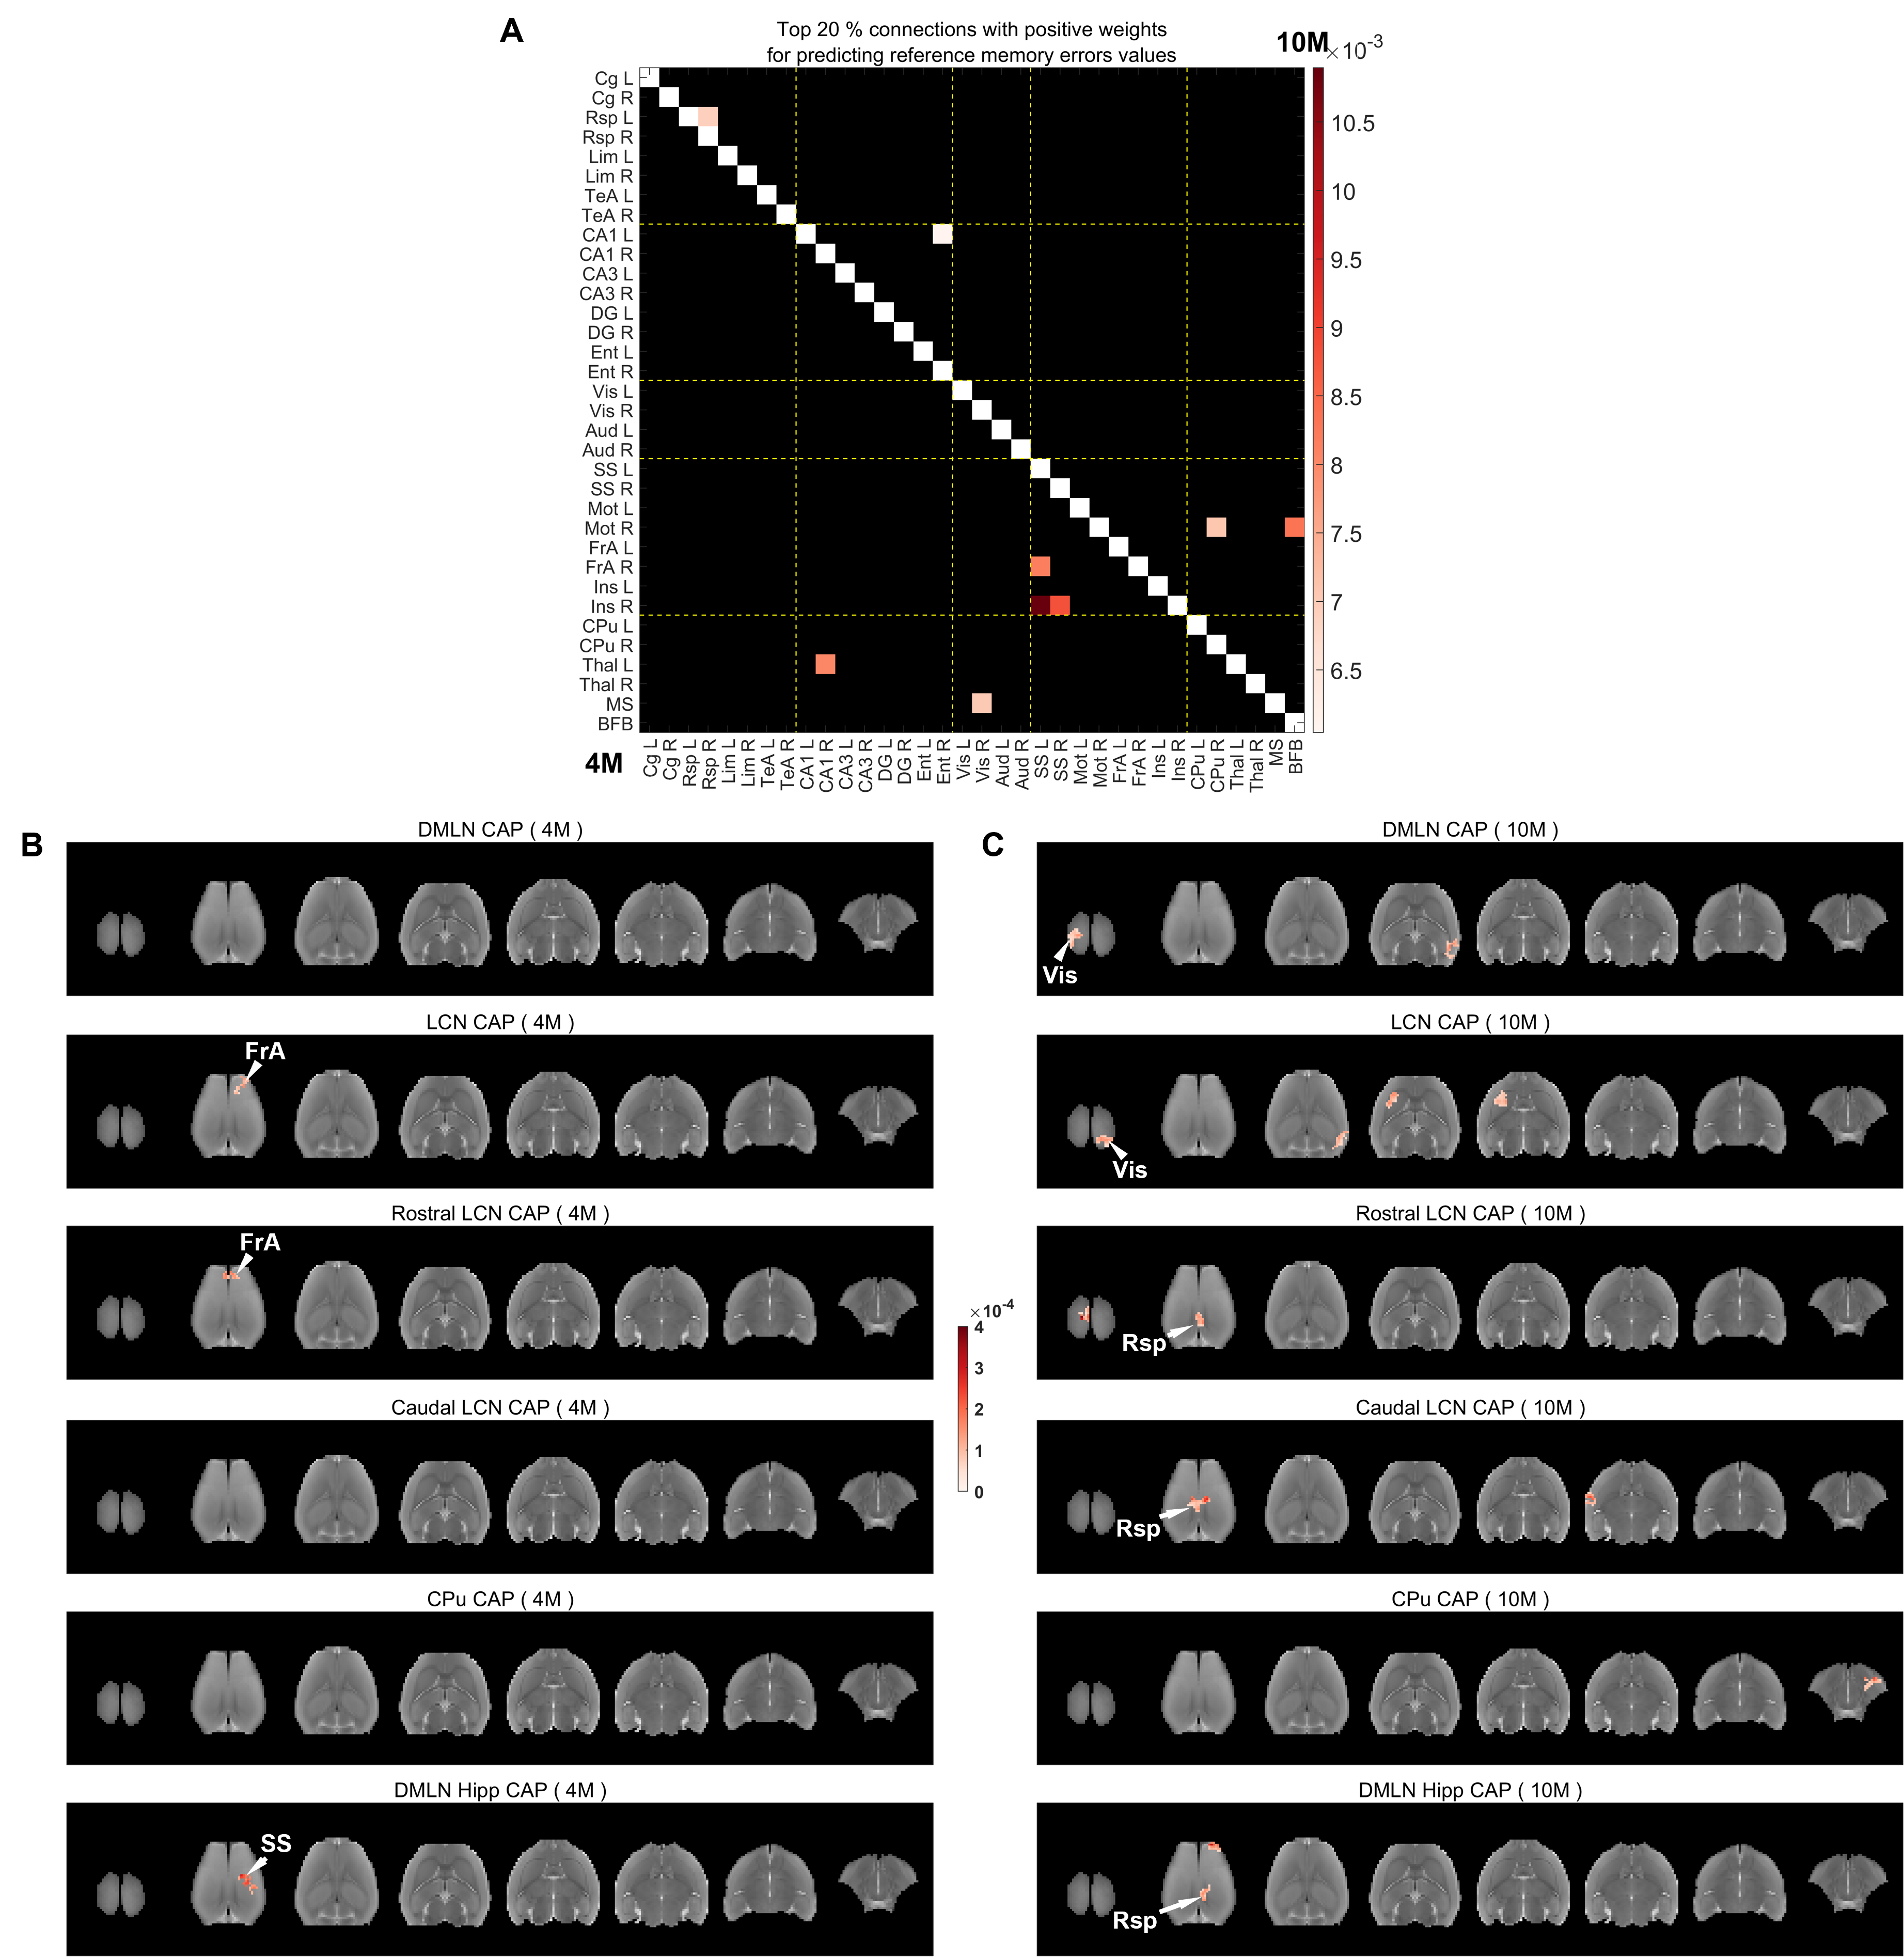
**

**Supplementary Figure 10: Salient functional connections (A) and voxel-clusters (B-C) within CAPs with positive beta weights at pre-plaque and plaque stages that explain WT-normalized reference memory errors in the TG animals. A:** Top 20% highest positive beta weights of functional connections with significant 95% FWER-corrected confidence intervals at 4M (below the diagonal) and 10M (above the diagonal). **B, C:** Positive beta weights for salient clustered voxels (cluster-size: 20 voxels, in plane), for which FWER corrected 95% confidence intervals do not cross zero, in each CAP at 4M(B) and 10M (C).

**
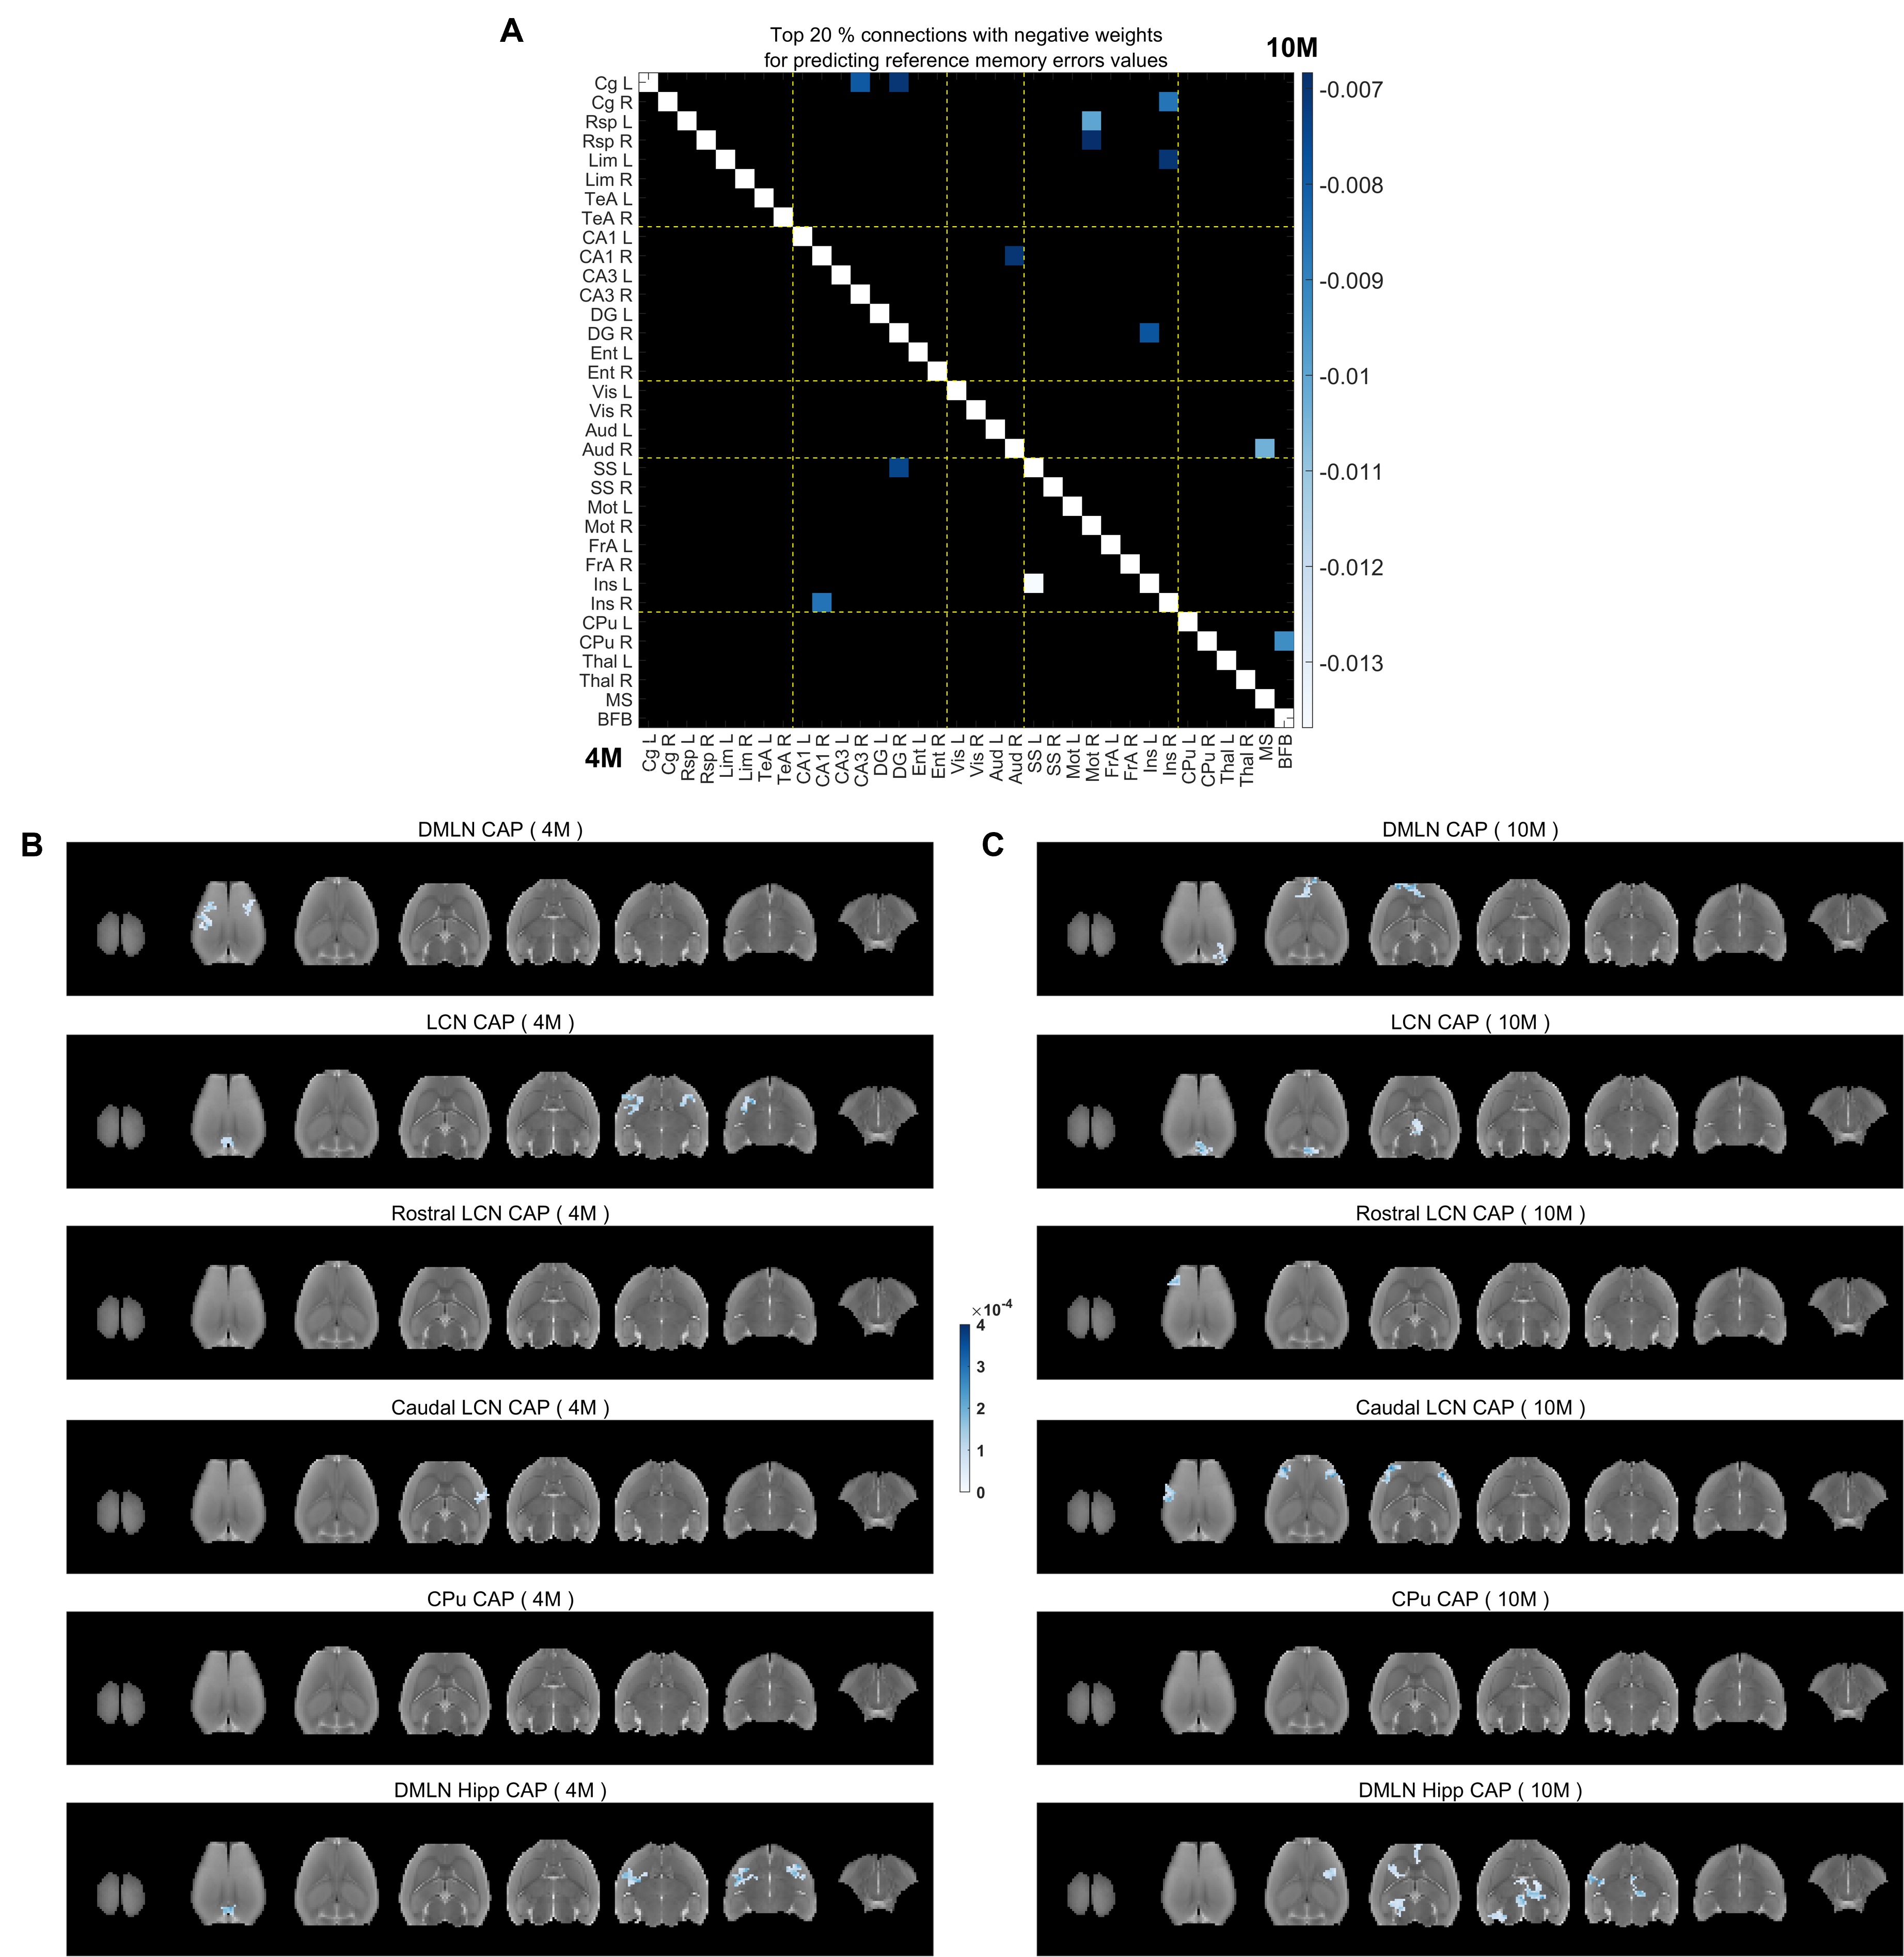
**

**Supplementary Figure 11: Salient functional connections (A) and voxel-clusters (B-C) within CAPs with negative beta weights at pre-plaque and plaque stages that explain WT-normalized reference memory errors in the TG animals. A:** Top 20% highest negative beta weights of functional connections with significant 95% FWER-corrected confidence intervals at 4M (below the diagonal) and 10M (above the diagonal). **B, C:** Negative beta weights for salient clustered voxels (cluster-size: 20 voxels, in plane), for which FWER corrected 95% confidence intervals do not cross zero, in each CAP at 4M (B) and 10M (C).

**
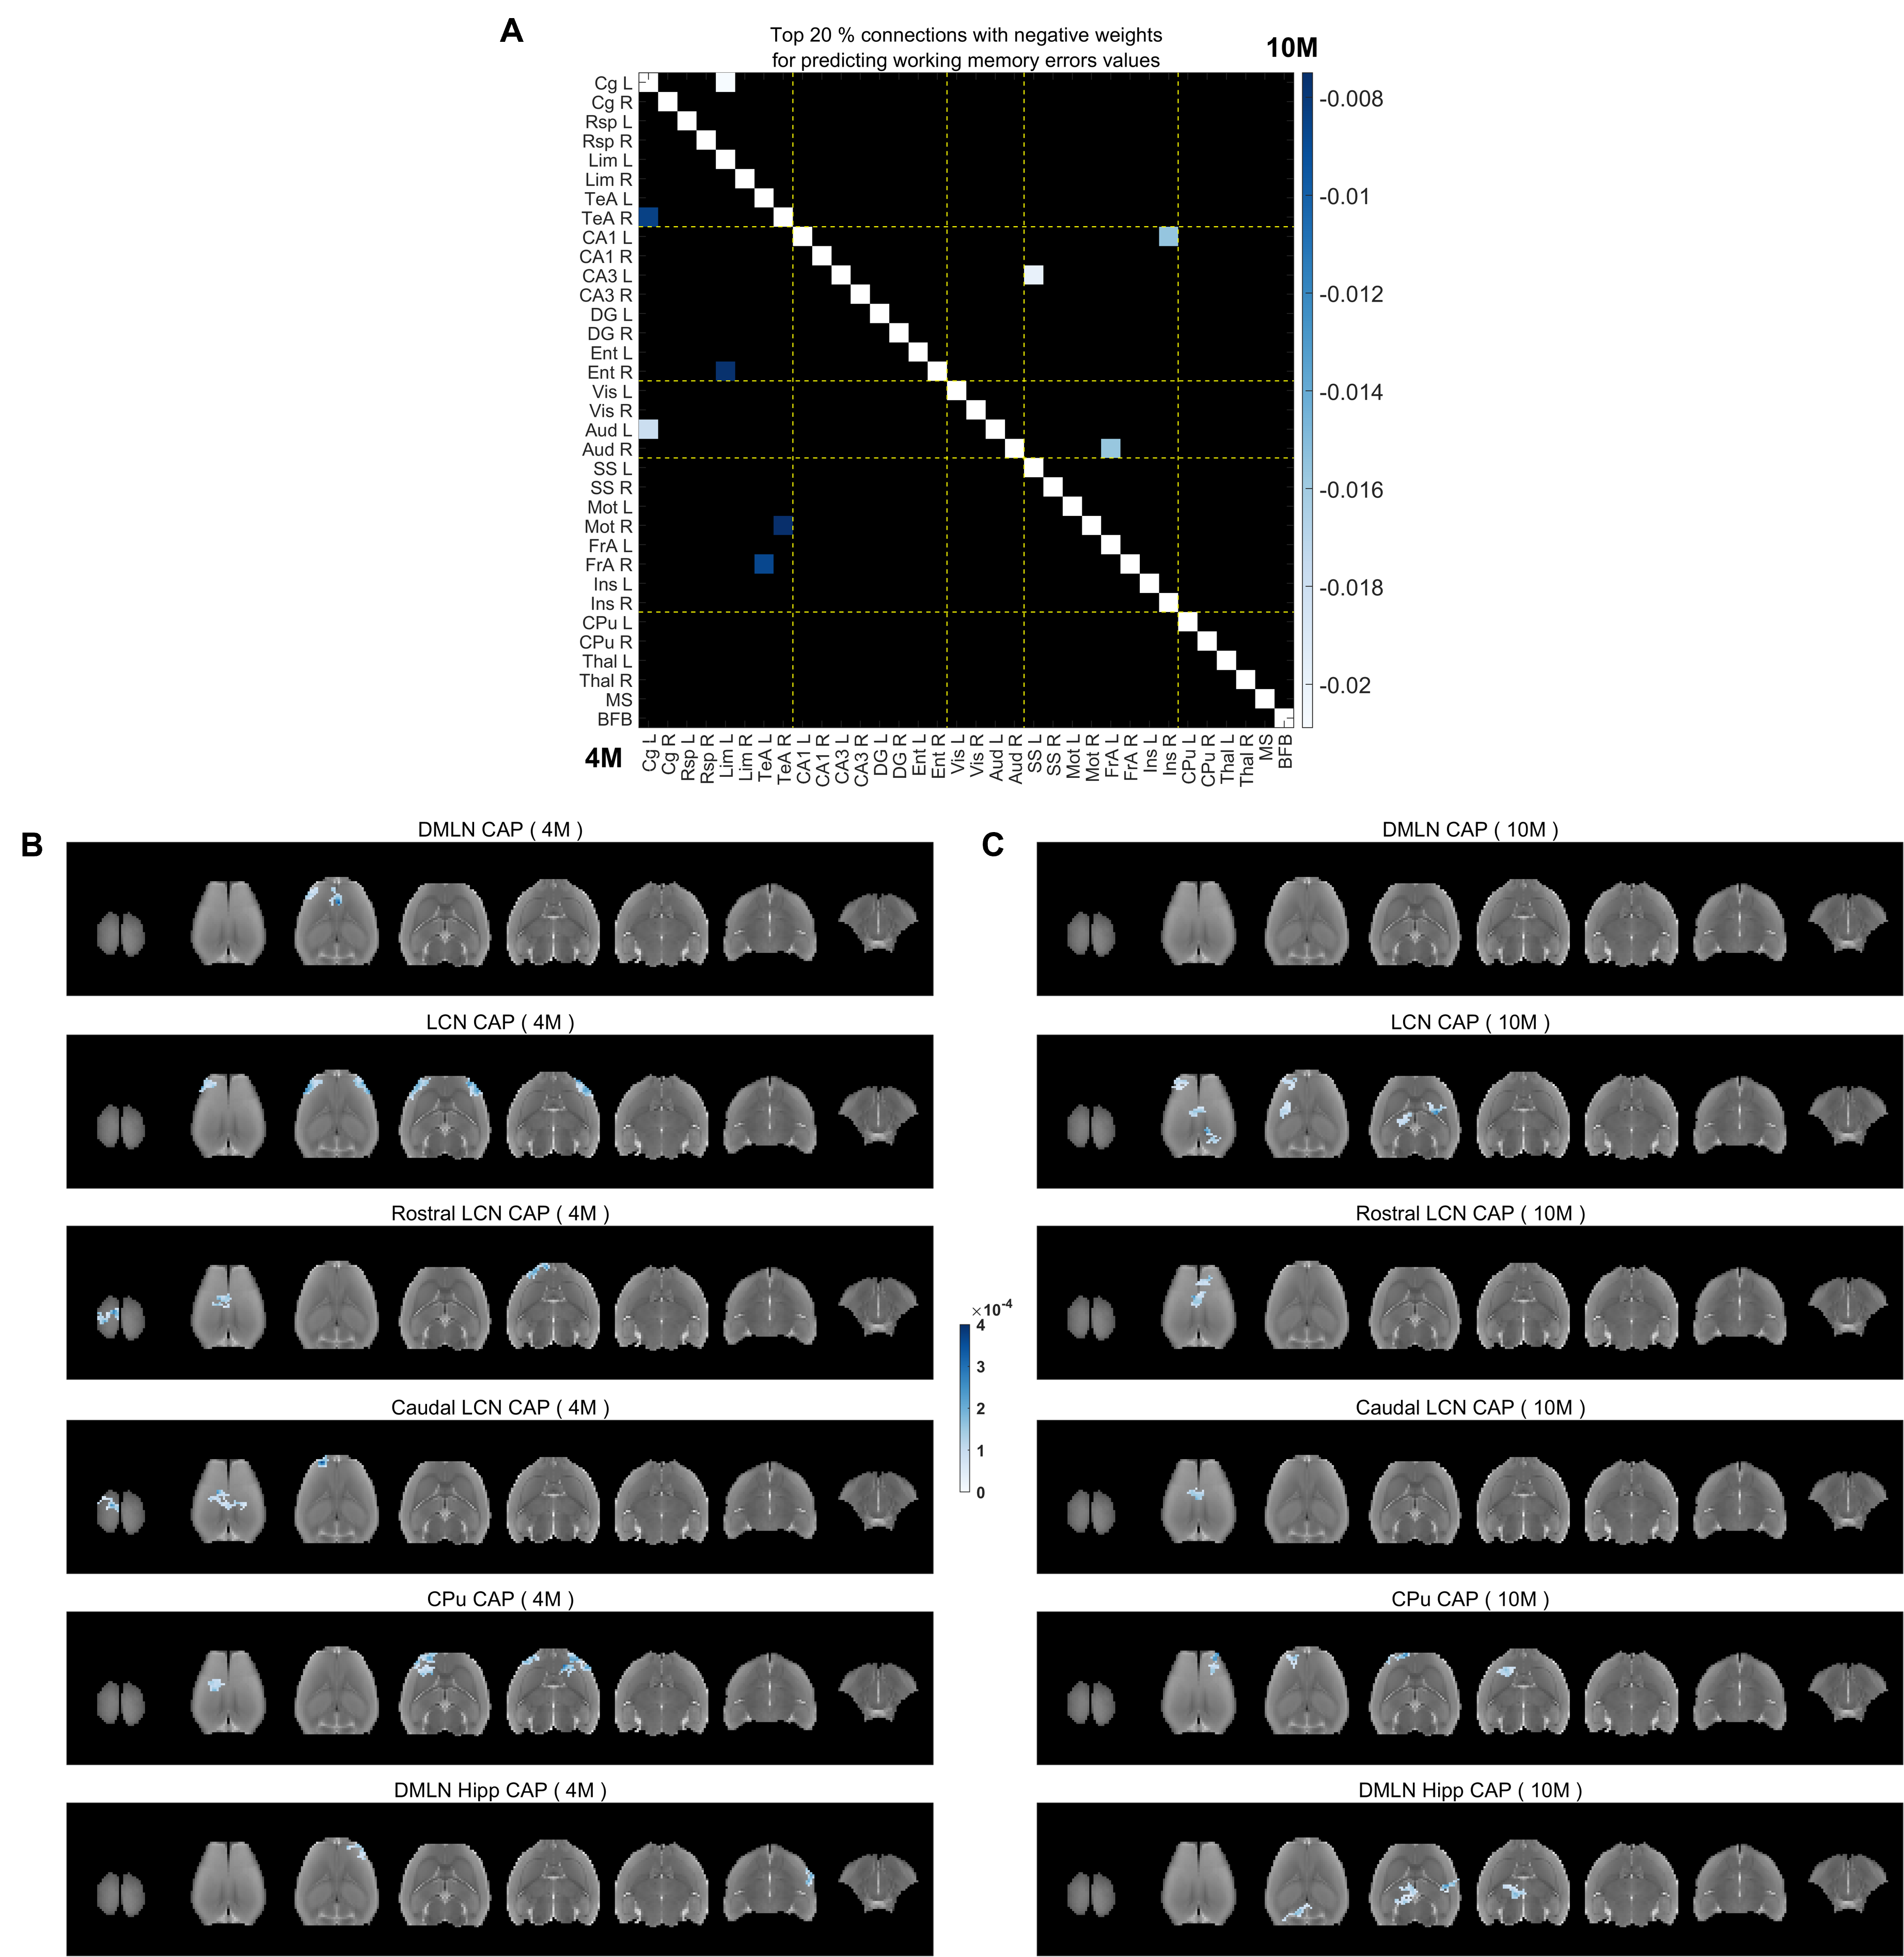
**

**Supplementary Figure 12: Salient functional connections (A) and voxel-clusters (B-C) within CAPs with negative beta weights at pre-plaque and plaque stages that predict WT-normalized working memory errors in the TG animals. A:** Top 20% highest negative beta weights of functional connections with significant 95% FWER-corrected confidence intervals at 4M (below the diagonal) and 10M (above the diagonal). **B, C:** Negative beta weights for salient clustered voxels (cluster-size: 20 voxels, in plane), for which FWER corrected 95% confidence intervals do not cross zero, in each CAP at 4M (B) and 10M (C).
